# Supplementary material for: Synthesis and reactivity of boryloxorhodium complexes. Relevance to intermolecular transmetalation from boron to rhodium in Rh-catalyzed reactions
Source: Royal Society of Chemistry journal article supplement (doi:10.1039/d1dt00440a), 2021-01-01
Supplement: d1dt00440a1.pdf [file d1dt00440a1.pdf]

*Supplementary Information*

*for*

**Synthesis and reactivity of boryloxorhodium complexes. relevance to intermolecular transmetalation from boron to rhodium in Rh-catalyzed reactions**

Yasushi Nishihara,<sup>\*a,b</sup> Yasuhiro Nishide<sup>a</sup>, and Kohtaro Osakada<sup>\*a</sup>

<sup>a</sup> *Laboratory for Chemistry and Life Science, Tokyo Institute of Technology, 4259 Nagatsuta, Yokohama 226-8503, Japan*  
*E-mail: osakada.k.aa@m.titech.ac.jp*

<sup>b</sup> *Research Institute for Interdisciplinary Science, Okayama University*  
*3-1-1 Tsushimanaka, Kita-ku, Okayama 700-8530, Japan*  
*E-mail: ynishiha@okayama-u.ac.jp*  
Phone: +81-86-251-7855  
Fax: +81-86-251-7855

**Table of Contents**

|                                                                                                                      |     |
|----------------------------------------------------------------------------------------------------------------------|-----|
| 1. Crystallographic data and details of structure refinement of <b>1</b>                                             | S2  |
| 2. Crystallographic data and details of structure refinement of <b>2</b>                                             | S9  |
| 3. Crystallographic data and details of structure refinement of <b>3</b>                                             | S17 |
| 4. Copies of NMR spectra                                                                                             | S26 |
| 5. Identification of byproducts in the reaction of $[Rh(OMe)(cod)]_2$ with 4-methylphenylboronic acid pinacol ester. | S31 |

## 1. Crystallographic data and details of structure refinement of 1

### *Experimental*

#### Data Collection

A pale yellow prismatic crystal of  $C_{28}H_{48}B_2O_6Rh_2$  having approximate dimensions of 0.450 x 0.300 x 0.200 mm was mounted on a glass fiber. All measurements were made on a Rigaku AFC5R diffractometer using graphite monochromated Mo-K $\alpha$  radiation and a rotating anode generator.

Cell constants and an orientation matrix for data collection, obtained from a least-squares refinement using the setting angles of 18 carefully centered reflections in the range  $18.93 < 2\theta < 21.09^\circ$  corresponded to a C-centered monoclinic cell with dimensions:

$$\begin{aligned} a &= 22.997(5) \text{ \AA} \\ b &= 6.3442(13) \text{ \AA} & \beta &= 95.25100^\circ \\ c &= 20.881(6) \text{ \AA} \\ V &= 3033.6(12) \text{ \AA}^3 \end{aligned}$$

For  $Z = 4$  and F.W. = 708.11, the calculated density is  $1.550 \text{ g/cm}^3$ . Based on the reflection conditions of:

$$\begin{aligned} hkl: & h+k = 2n \\ h0l: & l = 2n \end{aligned}$$

packing considerations, a statistical analysis of intensity distribution, and the successful solution and refinement of the structure, the space group was determined to be:

$$C2/c \text{ (\#15)}$$

The data were collected at a temperature of  $23 \pm 1^\circ\text{C}$  using the  $\omega$ - $2\theta$  scan technique to a maximum  $2\theta$  value of  $55.0^\circ$ . Omega scans of several intense reflections, made prior to data collection, had an average width at half-height of  $0.32^\circ$  with a take-off angle of  $6.0^\circ$ . Scans of  $(1.63 + 0.30 \tan \theta)^\circ$  were made at speeds ranging from 16.0 to  $8.0^\circ/\text{min}$  (in  $\omega$ ). The weak reflections ( $I < 10.0\sigma(I)$ ) were rescanned (maximum of 3 scans) and the counts were accumulated to ensure good counting statistics. Stationary background counts were recorded on each side of the reflection. The ratio of peak counting time to background counting time was 2:1. The diameter of the incident beam collimator was 1.0 mm, the crystal to detector distance was 258 mm, and the detector aperture was 6.0 x 6.0 mm (horizontal x vertical).

#### Data Reduction

Of the 2764 reflections were collected, where 2696 were unique ( $R_{\text{int}} = 0.0221$ ); equivalent reflections were merged. The intensities of three representative reflections were measured after every 150 reflections. Over the course of data collection, the standards increased by 3.3%. A linear correction factor was applied to the data to account for this phenomenon.

The linear absorption coefficient,  $\mu$ , for Mo-K $\alpha$  radiation is  $11.236 \text{ cm}^{-1}$ . The data were corrected for Lorentz and polarization effects.

## Structure Solution and Refinement

The structure was solved by heavy-atom Patterson methods<sup>1</sup> and expanded using Fourier techniques. The non-hydrogen atoms were refined anisotropically. Hydrogen atoms were refined using the riding model. The final cycle of full-matrix least-squares refinement<sup>2</sup> on  $F^2$  was based on 2744 observed reflections and 196 variable parameters and converged (largest parameter shift was 0.00 times its esd) with unweighted and weighted agreement factors of:

$$R1 = \Sigma ||F_o| - |F_c|| / \Sigma |F_o| = 0.0310$$
$$wR2 = [ \Sigma (w(F_o^2 - F_c^2)^2) / \Sigma w(F_o^2)^2 ]^{1/2} = 0.0939$$

The goodness of fit<sup>3</sup> was 1.03. A Sheldrick weighting scheme was used. Plots of  $S w (|F_o| - |F_c|)^2$  versus  $|F_o|$ , reflection order in data collection,  $\sin \theta/\lambda$  and various classes of indices showed no unusual trends. The maximum and minimum peaks on the final difference Fourier map corresponded to 0.52 and  $-0.74 \text{ e}^-/\text{\AA}^3$ , respectively.

Neutral atom scattering factors were taken from International Tables for X-ray Crystallography (IT), Vol. IV, Table 2.2B<sup>4</sup>. Anomalous dispersion effects were included in  $F_{calc}$ <sup>5</sup>; the values for  $\Delta f'$  and  $\Delta f''$  were those of Creagh and McAuley<sup>6</sup>. The values for the mass attenuation coefficients are those of Creagh and Hubbell<sup>7</sup>. All calculations were performed using the CrystalStructure<sup>8,9</sup> crystallographic software package.

## *References*

(1) PATY: Beurskens, P.T., Admiraal, G., Behm, H., Beurskens, G., Smits, J.M.M. and Smykalla, C. (1991). *Z. f. Kristallogr. Suppl.* 4, p.99.

(2) Least Squares function minimized:

$$\Sigma w(F_o^2 - F_c^2)^2 \quad \text{where } w = \text{Least Squares weights.}$$

(3) Goodness of fit is defined as:

$$[\Sigma w(F_o^2 - F_c^2)^2 / (N_o - N_v)]^{1/2}$$

where:  $N_o$  = number of observations  
 $N_v$  = number of variables

(4) International Tables for X-ray Crystallography, Vol. IV (1974). Ed. J.A. Ibers and W.C. Hamilton, The Kynoch Press, Birmingham, England, Table 2.2B, pp. 99.

(5) Ibers, J. A. & Hamilton, W. C.; *Acta Crystallogr.*, 17, 781 (1964).

(6) Creagh, D. C. & McAuley, W.J; "International Tables for Crystallography", Vol C, (A.J.C. Wilson, ed.), Kluwer Academic Publishers, Boston, Table 4.2.6.8, pages 219-222 (1992).

(7) Creagh, D. C. & Hubbell, J.H.; "International Tables for Crystallography", Vol C, (A.J.C. Wilson, ed.), Kluwer Academic Publishers, Boston, Table 4.2.4.3, pages 200-206 (1992).

(8) CrystalStructure 4.2.5: Crystal Structure Analysis Package, Rigaku Corporation (2000-2017). Tokyo 196-8666, Japan.

(9) CRYSTALS Issue 11: Carruthers, J.R., Rollett, J.S., Betteridge, P.W., Kinna, D., Pearce, L., Larsen, A., and Gabe, E. Chemical Crystallography Laboratory, Oxford, UK. (1999)

### *EXPERIMENTAL DETAILS*

#### A. Crystal Data

|                                       |                                                                                                                          |
|---------------------------------------|--------------------------------------------------------------------------------------------------------------------------|
| Empirical Formula                     | C <sub>28</sub> H <sub>48</sub> B <sub>2</sub> O <sub>6</sub> Rh <sub>2</sub>                                            |
| Formula Weight                        | 708.11                                                                                                                   |
| Crystal Color, Habit                  | pale yellow, prismatic                                                                                                   |
| Crystal Dimensions                    | 0.450 X 0.300 X 0.200 mm                                                                                                 |
| Crystal System                        | monoclinic                                                                                                               |
| Lattice Type                          | C-centered                                                                                                               |
| No. of Reflections Used for Unit      |                                                                                                                          |
| Cell Determination (2 $\theta$ range) | 18 (18.9 - 21.1 $^{\circ}$ )                                                                                             |
| Omega Scan Peak Width                 |                                                                                                                          |
| at Half-height                        | 0.32 $^{\circ}$                                                                                                          |
| Lattice Parameters                    | a = 22.997(5) Å<br>b = 6.3442(13) Å<br>c = 20.881(6) Å<br>$\beta$ = 95.25100 $^{\circ}$<br>V = 3033.6(12) Å <sup>3</sup> |
| Space Group                           | C2/c (#15)                                                                                                               |
| Z value                               | 4                                                                                                                        |
| D <sub>calc</sub>                     | 1.550 g/cm <sup>3</sup>                                                                                                  |
| F <sub>000</sub>                      | 1456.00                                                                                                                  |
| $\mu$ (MoK $\alpha$ )                 | 11.236 cm <sup>-1</sup>                                                                                                  |

#### B. Intensity Measurements

|                              |                                                                 |
|------------------------------|-----------------------------------------------------------------|
| Diffractionmeter             | AFC5R                                                           |
| Radiation                    | MoK $\alpha$ ( $\lambda$ = 0.71069 Å)<br>graphite monochromated |
| Attenuator                   | Zr foil (factors = 1.00, 3.52, 11.54, 41.93)                    |
| Take-off Angle               | 6.0 $^{\circ}$                                                  |
| Detector Aperture            | 6.0 mm horizontal<br>6.0 mm vertical                            |
| Crystal to Detector Distance | 258 mm                                                          |
| Voltage, Current             | 50kV, 180mA                                                     |
| Temperature                  | 23.0 $^{\circ}$ C                                               |

|                             |                                                           |
|-----------------------------|-----------------------------------------------------------|
| Scan Type                   | $\omega$ -2 $\theta$                                      |
| Scan Rate                   | 16.0 - 8.0°/min (in $\omega$ ) (up to 3 scans)            |
| Scan Width                  | $(1.63 + 0.30 \tan \theta)^\circ$                         |
| 2 $\theta_{\max}$           | 50.0°                                                     |
| No. of Reflections Measured | Total: 2744<br>Unique: 2676 ( $R_{\text{int}} = 0.0221$ ) |
| Corrections                 | Lorentz-polarization<br>Decay (3.27% increase)            |

### C. Structure Solution and Refinement

|                                       |                                             |
|---------------------------------------|---------------------------------------------|
| Structure Solution                    | Patterson Methods (DIRDIF99 PATTY)          |
| Refinement                            | Full-matrix least-squares on $F^2$          |
| Function Minimized                    | $\sum w (F_o^2 - F_c^2)^2$                  |
| Least Squares Weights                 | $1/[0.0010F_o^2 + 1.0000s(F_o^2)]/(4F_o^2)$ |
| 2 $\theta_{\max}$ cutoff              | 52.0°                                       |
| Anomalous Dispersion                  | All non-hydrogen atoms                      |
| No. Observations (All reflections)    | 2744                                        |
| No. Variables                         | 196                                         |
| Reflection/Parameter Ratio            | 14.00                                       |
| Residuals: R1 ( $I > 2.00\sigma(I)$ ) | 0.0310                                      |
| Residuals: R (All reflections)        | 0.0399                                      |
| Residuals: wR2 (All reflections)      | 0.0939                                      |
| Goodness of Fit Indicator             | 1.029                                       |
| Max Shift/Error in Final Cycle        | 0.000                                       |
| Maximum peak in Final Diff. Map       | 0.52 e <sup>-</sup> /Å <sup>3</sup>         |
| Minimum peak in Final Diff. Map       | -0.74 e <sup>-</sup> /Å <sup>3</sup>        |

Table S1. Atomic coordinates and  $B_{\text{iso}}/B_{\text{eq}}$

| atom | x            | y          | z            | $B_{\text{eq}}$ |
|------|--------------|------------|--------------|-----------------|
| Rh1  | 0.030070(10) | 0.16806(4) | 0.191150(10) | 2.230(7)        |
| O1   | -0.10134(11) | 0.4896(5)  | 0.13323(13)  | 3.80(6)         |
| O2   | -0.05077(10) | 0.2834(4)  | 0.21538(11)  | 2.96(5)         |
| O3   | -0.15491(12) | 0.2636(5)  | 0.18852(13)  | 4.05(6)         |
| C1   | 0.0289(2)    | -0.2380(8) | 0.1148(3)    | 5.77(13)        |
| C2   | -0.2481(2)   | 0.2636(9)  | 0.1270(2)    | 5.09(11)        |
| C3   | 0.00767(17)  | 0.1521(6)  | 0.09174(17)  | 3.13(8)         |
| C4   | 0.11475(15)  | 0.1330(6)  | 0.16286(18)  | 3.21(8)         |

|     |              |            |             |          |
|-----|--------------|------------|-------------|----------|
| C5  | -0.1585(3)   | 0.3513(9)  | 0.0413(2)   | 5.60(13) |
| C6  | -0.19680(17) | 0.3988(7)  | 0.15234(19) | 3.58(9)  |
| C7  | -0.15999(16) | 0.4900(7)  | 0.10029(18) | 3.50(8)  |
| C8  | -0.00599(16) | -0.0400(6) | 0.11972(19) | 3.55(9)  |
| C9  | 0.0598(2)    | 0.1862(9)  | 0.0543(2)   | 4.99(12) |
| C10 | -0.1746(3)   | 0.7149(8)  | 0.0805(3)   | 5.67(13) |
| C11 | 0.09905(17)  | -0.0480(6) | 0.1948(2)   | 3.61(9)  |
| C12 | 0.1168(2)    | 0.1463(10) | 0.0911(2)   | 5.34(13) |
| C13 | -0.2170(2)   | 0.5648(10) | 0.1979(2)   | 5.86(14) |
| C14 | 0.0798(3)    | -0.2520(9) | 0.1628(3)   | 6.73(15) |
| B1  | -0.10027(17) | 0.3420(7)  | 0.18101(18) | 2.55(8)  |

$$B_{eq} = 8/3 \pi^2 (U_{11}(aa^*)^2 + U_{22}(bb^*)^2 + U_{33}(cc^*)^2 + 2U_{12}(aa*bb^*)\cos \gamma + 2U_{13}(aa*cc^*)\cos \square + 2U_{23}(bb*cc^*)\cos \alpha)$$

Table S2. Anisotropic displacement parameters

| atom | U <sub>11</sub> | U <sub>22</sub> | U <sub>33</sub> | U <sub>12</sub> | U <sub>13</sub> | U <sub>23</sub> |
|------|-----------------|-----------------|-----------------|-----------------|-----------------|-----------------|
| Rh1  | 0.02174(18)     | 0.03554(19)     | 0.02741(18)     | 0.00103(10)     | 0.00195(11)     | -0.00083(10)    |
| O1   | 0.0299(13)      | 0.0606(18)      | 0.0532(15)      | -0.0001(13)     | -0.0001(11)     | 0.0178(14)      |
| O2   | 0.0268(12)      | 0.0556(17)      | 0.0302(12)      | 0.0070(12)      | 0.0036(10)      | 0.0014(11)      |
| O3   | 0.0335(14)      | 0.0680(19)      | 0.0512(16)      | 0.0016(14)      | -0.0021(13)     | 0.0215(15)      |
| C1   | 0.071(3)        | 0.044(3)        | 0.101(4)        | -0.001(3)       | -0.007(3)       | -0.023(3)       |
| C2   | 0.037(2)        | 0.080(3)        | 0.075(3)        | -0.004(2)       | -0.007(2)       | 0.004(3)        |
| C3   | 0.0339(19)      | 0.055(2)        | 0.0293(18)      | 0.0080(17)      | -0.0016(15)     | -0.0045(16)     |
| C4   | 0.0233(17)      | 0.060(3)        | 0.039(2)        | 0.0054(17)      | 0.0053(15)      | -0.0076(17)     |
| C5   | 0.070(3)        | 0.103(4)        | 0.039(2)        | 0.012(3)        | 0.003(2)        | -0.006(2)       |
| C6   | 0.0303(19)      | 0.063(3)        | 0.042(2)        | 0.0065(19)      | -0.0014(17)     | 0.0063(19)      |
| C7   | 0.0328(18)      | 0.055(2)        | 0.044(2)        | 0.0080(19)      | -0.0012(15)     | 0.0099(19)      |
| C8   | 0.0305(18)      | 0.052(3)        | 0.051(2)        | -0.0055(17)     | -0.0037(16)     | -0.0168(18)     |
| C9   | 0.053(3)        | 0.098(4)        | 0.040(2)        | 0.002(3)        | 0.011(2)        | 0.002(2)        |
| C10  | 0.067(3)        | 0.068(3)        | 0.080(4)        | 0.013(3)        | 0.002(3)        | 0.033(3)        |
| C11  | 0.036(2)        | 0.047(2)        | 0.053(2)        | 0.0115(17)      | -0.0034(17)     | 0.0003(18)      |
| C12  | 0.040(2)        | 0.123(5)        | 0.041(2)        | 0.007(3)        | 0.0133(19)      | 0.001(3)        |
| C13  | 0.054(3)        | 0.104(5)        | 0.066(3)        | 0.014(3)        | 0.013(2)        | -0.022(3)       |
| C14  | 0.081(4)        | 0.044(3)        | 0.127(5)        | 0.016(3)        | -0.009(4)       | -0.014(3)       |
| B1   | 0.0252(19)      | 0.044(2)        | 0.0272(18)      | 0.0053(16)      | 0.0003(15)      | -0.0028(16)     |

The general temperature factor expression:  $\exp(-2p^2(a^2U_{11}h^2 + b^2U_{22}k^2 + c^2U_{33}l^2 + 2a*b*U_{12}hk$

$$+ 2a*c*U_{13hl} + 2b*c*U_{23kl})$$

Table S3. Bond lengths (Å)

| atom | atom             | distance  | atom | atom | distance |
|------|------------------|-----------|------|------|----------|
| Rh1  | Rh1 <sup>1</sup> | 2.9283(7) | Rh1  | O2   | 2.102(2) |
| Rh1  | O2 <sup>1</sup>  | 2.098(2)  | Rh1  | C3   | 2.095(4) |
| Rh1  | C4               | 2.098(4)  | Rh1  | C8   | 2.104(4) |
| Rh1  | C11              | 2.092(4)  | O1   | C7   | 1.457(4) |
| O1   | B1               | 1.367(5)  | O2   | B1   | 1.342(4) |
| O3   | C6               | 1.450(5)  | O3   | B1   | 1.374(5) |
| C1   | C8               | 1.499(7)  | C1   | C14  | 1.473(8) |
| C2   | C6               | 1.514(6)  | C3   | C8   | 1.400(6) |
| C3   | C9               | 1.505(6)  | C4   | C11  | 1.392(6) |
| C4   | C12              | 1.506(6)  | C5   | C7   | 1.516(6) |
| C6   | C7               | 1.549(6)  | C6   | C13  | 1.520(7) |
| C7   | C10              | 1.515(7)  | C9   | C12  | 1.480(6) |
| C11  | C14              | 1.505(7)  |      |      |          |

Symmetry Operators:

(1) -X,Y,-Z+1/2

Table S4. Bond angles (°)

| atom             | atom | atom             | angle      | atom             | atom | atom            | angle      |
|------------------|------|------------------|------------|------------------|------|-----------------|------------|
| Rh1 <sup>1</sup> | Rh1  | O2               | 45.74(6)   | Rh1 <sup>1</sup> | Rh1  | O2 <sup>1</sup> | 45.86(7)   |
| Rh1 <sup>1</sup> | Rh1  | C3               | 137.68(11) | Rh1 <sup>1</sup> | Rh1  | C4              | 139.31(10) |
| Rh1 <sup>1</sup> | Rh1  | C8               | 114.15(11) | Rh1 <sup>1</sup> | Rh1  | C11             | 112.59(12) |
| O2               | Rh1  | O2 <sup>1</sup>  | 77.59(9)   | O2               | Rh1  | C3              | 96.46(12)  |
| O2               | Rh1  | C4               | 165.64(13) | O2               | Rh1  | C8              | 95.11(12)  |
| O2               | Rh1  | C11              | 154.60(13) | O2 <sup>1</sup>  | Rh1  | C3              | 162.35(13) |
| O2 <sup>1</sup>  | Rh1  | C4               | 99.29(12)  | O2 <sup>1</sup>  | Rh1  | C8              | 156.82(13) |
| O2 <sup>1</sup>  | Rh1  | C11              | 95.04(13)  | C3               | Rh1  | C4              | 82.32(15)  |
| C3               | Rh1  | C8               | 38.95(15)  | C3               | Rh1  | C11             | 96.97(16)  |
| C4               | Rh1  | C8               | 92.85(15)  | C4               | Rh1  | C11             | 38.80(16)  |
| C8               | Rh1  | C11              | 82.14(15)  | C7               | O1   | B1              | 107.4(3)   |
| Rh1              | O2   | Rh1 <sup>1</sup> | 88.40(9)   | Rh1              | O2   | B1              | 133.9(2)   |
| Rh1 <sup>1</sup> | O2   | B1               | 134.7(2)   | C6               | O3   | B1              | 107.3(3)   |
| C8               | C1   | C14              | 113.7(4)   | Rh1              | C3   | C8              | 70.9(2)    |
| Rh1              | C3   | C9               | 111.9(3)   | C8               | C3   | C9              | 124.2(4)   |
| Rh1              | C4   | C11              | 70.4(2)    | Rh1              | C4   | C12             | 112.9(3)   |

|     |     |     |          |     |     |     |          |
|-----|-----|-----|----------|-----|-----|-----|----------|
| C11 | C4  | C12 | 123.8(4) | O3  | C6  | C2  | 107.8(4) |
| O3  | C6  | C7  | 101.9(3) | O3  | C6  | C13 | 108.1(3) |
| C2  | C6  | C7  | 115.1(3) | C2  | C6  | C13 | 109.8(4) |
| C7  | C6  | C13 | 113.5(4) | O1  | C7  | C5  | 107.1(3) |
| O1  | C7  | C6  | 102.1(3) | O1  | C7  | C10 | 107.6(4) |
| C5  | C7  | C6  | 114.0(4) | C5  | C7  | C10 | 110.2(4) |
| C6  | C7  | C10 | 115.0(4) | Rh1 | C8  | C1  | 113.3(3) |
| Rh1 | C8  | C3  | 70.2(2)  | C1  | C8  | C3  | 124.0(4) |
| C3  | C9  | C12 | 114.6(4) | Rh1 | C11 | C4  | 70.8(2)  |
| Rh1 | C11 | C14 | 110.9(3) | C4  | C11 | C14 | 125.1(4) |
| C4  | C12 | C9  | 114.8(4) | C1  | C14 | C11 | 115.7(4) |
| O1  | B1  | O2  | 122.6(3) | O1  | B1  | O3  | 112.1(3) |
| O2  | B1  | O3  | 125.4(3) |     |     |     |          |

Symmetry Operators:

(1) -X,Y,-Z+1/2



## 2. Crystallographic data and details of structure refinement of 2

### *Experimental*

#### Data Collection

A dark yellow prismatic crystal of  $C_{32}H_{39}BO_3PRh$  having approximate dimensions of 0.650 x 0.530 x 0.300 mm was mounted on a glass fiber. All measurements were made on a Rigaku AFC5R diffractometer using graphite monochromated Mo- $K\alpha$  radiation and a rotating anode generator.

Cell constants and an orientation matrix for data collection, obtained from a least-squares refinement using the setting angles of 20 carefully centered reflections in the range  $18.87 < 2\theta < 21.62^\circ$  corresponded to a primitive triclinic cell with dimensions:

$$\begin{array}{ll} a = 10.519(2) \text{ \AA} & \alpha = 102.334(17)^\circ \\ b = 15.348(3) \text{ \AA} & \beta = 96.79140^\circ \\ c = 9.920(2) \text{ \AA} & \gamma = 102.86550^\circ \\ V = 1502.1(6) \text{ \AA}^3 & \end{array}$$

For  $Z = 2$  and F.W. = 616.35, the calculated density is  $1.363 \text{ g/cm}^3$ . Based on a statistical analysis of intensity distribution, and the successful solution and refinement of the structure, the space group was determined to be:

$$P-1 (\#2)$$

The data were collected at a temperature of  $23 \pm 1^\circ\text{C}$  using the  $\omega$ - $2\theta$  scan technique to a maximum  $2\theta$  value of  $55.0^\circ$ . Omega scans of several intense reflections, made prior to data collection, had an average width at half-height of  $0.32^\circ$  with a take-off angle of  $6.0^\circ$ . Scans of  $(1.68 + 0.30 \tan \theta)^\circ$  were made at a speed of  $16.0^\circ/\text{min}$  (in  $\omega$ ). The weak reflections ( $I < 10.0\sigma(I)$ ) were rescanned (maximum of 3 scans) and the counts were accumulated to ensure good counting statistics. Stationary background counts were recorded on each side of the reflection. The ratio of peak counting time to background counting time was 2:1. The diameter of the incident beam collimator was 1.0 mm, the crystal to detector distance was 250 mm, and the detector aperture was 6.0 x 6.0 mm (horizontal x vertical).

#### Data Reduction

Of the 7269 reflections were collected, where 6894 were unique ( $R_{\text{int}} = 0.0145$ ); equivalent reflections were merged. The intensities of three representative reflections were measured after every 150 reflections. Over the course of data collection, the standards decreased by 0.9%. A linear correction factor was applied to the data to account for this phenomenon.

The linear absorption coefficient,  $\mu$ , for Mo- $K\alpha$  radiation is  $6.507 \text{ cm}^{-1}$ . The data were corrected for Lorentz and polarization effects.

#### Structure Solution and Refinement

The structure was solved by heavy-atom Patterson methods<sup>1</sup> and expanded using Fourier techniques. The non-hydrogen atoms were refined anisotropically. Hydrogen atoms were refined using the riding model. The final cycle of full-matrix least-squares refinement<sup>2</sup> on  $F^2$  was based on 6894

observed reflections and 382 variable parameters and converged (largest parameter shift was 0.00 times its esd) with unweighted and weighted agreement factors of:

$$R1 = \sum ||F_o| - |F_c|| / \sum |F_o| = 0.0372$$

$$wR2 = [ \sum (w(F_o^2 - F_c^2)^2) / \sum w(F_o^2)^2 ]^{1/2} = 0.1021$$

The goodness of fit<sup>3</sup> was 1.08. A Chebychev polynomial weighting scheme was used<sup>4</sup>. Plots of  $S w (|F_o| - |F_c|)^2$  versus  $|F_o|$ , reflection order in data collection,  $\sin \theta/\lambda$  and various classes of indices showed no unusual trends. The maximum and minimum peaks on the final difference Fourier map corresponded to 0.85 and -1.15 e<sup>-</sup>/Å<sup>3</sup>, respectively.

Neutral atom scattering factors were taken from International Tables for X-ray Crystallography (IT), Vol. IV, Table 2.2B<sup>5</sup>. Anomalous dispersion effects were included in  $F_{calc}$ <sup>6</sup>; the values for  $\Delta f'$  and  $\Delta f''$  were those of Creagh and McAuley<sup>7</sup>. The values for the mass attenuation coefficients are those of Creagh and Hubbell<sup>8</sup>. All calculations were performed using the CrystalStructure<sup>9,10</sup> crystallographic software package.

#### *References*

- (1) PATTY: Beurskens, P.T., Admiraal, G., Behm, H., Beurskens, G., Smits, J.M.M. and Smykalla, C. (1991). Z. f. Kristallogr. Suppl.4, p.99.
- (2) Least Squares function minimized:  

$$\sum w(F_o^2 - F_c^2)^2 \quad \text{where } w = \text{Least Squares weights.}$$
- (3) Goodness of fit is defined as:  

$$[\sum w(F_o^2 - F_c^2)^2 / (N_o - N_v)]^{1/2}$$

where:  $N_o$  = number of observations  
 $N_v$  = number of variables
- (4) Carruthers, J.R. and Watkin, D.J. (1979), Acta Cryst, A35, 698-699
- (5) International Tables for X-ray Crystallography, Vol. IV (1974). Ed. J.A. Ibers and W.C. Hamilton, The Kynoch Press, Birmingham, England, Table 2.2B, pp. 99.
- (6) Ibers, J. A. & Hamilton, W. C.; Acta Crystallogr., 17, 781 (1964).
- (7) Creagh, D. C. & McAuley, W.J; "International Tables for Crystallography", Vol C, (A.J.C. Wilson, ed.), Kluwer Academic Publishers, Boston, Table 4.2.6.8, pages 219-222 (1992).
- (8) Creagh, D. C. & Hubbell, J.H.; "International Tables for Crystallography", Vol C, (A.J.C. Wilson, ed.), Kluwer Academic Publishers, Boston, Table 4.2.4.3, pages 200-206 (1992).
- (9) CrystalStructure 4.2.5: Crystal Structure Analysis Package, Rigaku Corporation (2000-2017). Tokyo 196-8666, Japan.
- (10) CRYSTALS Issue 11: Carruthers, J.R., Rollett, J.S., Betteridge, P.W., Kinna, D., Pearce, L., Larsen, A., and Gabe, E. Chemical Crystallography Laboratory, Oxford, UK. (1999)

#### *EXPERIMENTAL DETAILS*

| A. Crystal Data                  |                                                     |
|----------------------------------|-----------------------------------------------------|
| Empirical Formula                | C <sub>32</sub> H <sub>39</sub> BO <sub>3</sub> PRh |
| Formula Weight                   | 616.35                                              |
| Crystal Color, Habit             | dark yellow, prismatic                              |
| Crystal Dimensions               | 0.650 X 0.530 X 0.300 mm                            |
| Crystal System                   | triclinic                                           |
| Lattice Type                     | Primitive                                           |
| No. of Reflections Used for Unit |                                                     |
| Cell Determination (2θ range)    | 20 (18.9 - 21.6°)                                   |
| Omega Scan Peak Width            |                                                     |
| at Half-height                   | 0.32°                                               |
| Lattice Parameters               | a = 10.519(2) Å                                     |
|                                  | b = 15.348(3) Å                                     |
|                                  | c = 9.920(2) Å                                      |
|                                  | α = 102.334(17) °                                   |
|                                  | β = 96.79140 °                                      |
|                                  | γ = 102.86550 °                                     |
|                                  | V = 1502.1(6) Å <sup>3</sup>                        |
| Space Group                      | P-1 (#2)                                            |
| Z value                          | 2                                                   |
| D <sub>calc</sub>                | 1.363 g/cm <sup>3</sup>                             |
| F <sub>000</sub>                 | 640.00                                              |
| μ(MoKα)                          | 6.507 cm <sup>-1</sup>                              |

#### B. Intensity Measurements

|                              |                                              |
|------------------------------|----------------------------------------------|
| Diffractometer               | AFC5R                                        |
| Radiation                    | MoKα (λ = 0.71069 Å)                         |
|                              | graphite monochromated                       |
| Attenuator                   | Zr foil (factors = 1.00, 3.63, 11.97, 42.77) |
| Take-off Angle               | 6.0°                                         |
| Detector Aperture            | 6.0 mm horizontal                            |
|                              | 6.0 mm vertical                              |
| Crystal to Detector Distance | 250 mm                                       |
| Voltage, Current             | 50kV, 180mA                                  |
| Temperature                  | 23.0°C                                       |
| Scan Type                    | ω-2θ                                         |

|                             |                                                           |
|-----------------------------|-----------------------------------------------------------|
| Scan Rate                   | 16.0°/min (in $\omega$ ) (up to 3 scans)                  |
| Scan Width                  | (1.68 + 0.30 tan $\theta$ )°                              |
| 2 $\theta$ <sub>max</sub>   | 55.0°                                                     |
| No. of Reflections Measured | Total: 7269<br>Unique: 6894 ( $R_{\text{int}} = 0.0145$ ) |
| Corrections                 | Lorentz-polarization<br>Decay (0.93% decline)             |

### C. Structure Solution and Refinement

|                                       |                                                                         |
|---------------------------------------|-------------------------------------------------------------------------|
| Structure Solution                    | Patterson Methods (DIRDIF99 PATTY)                                      |
| Refinement                            | Full-matrix least-squares on $F^2$                                      |
| Function Minimized                    | $\Sigma w (F_o^2 - F_c^2)^2$                                            |
| Least Squares Weights                 | Chebyshev polynomial with 3 parameters<br>68800.7000,68778.3000,0.0000, |
| 2 $\theta$ <sub>max</sub> cutoff      | 55.0°                                                                   |
| Anomalous Dispersion                  | All non-hydrogen atoms                                                  |
| No. Observations (All reflections)    | 6894                                                                    |
| No. Variables                         | 382                                                                     |
| Reflection/Parameter Ratio            | 18.05                                                                   |
| Residuals: R1 ( $I > 2.00\sigma(I)$ ) | 0.0372                                                                  |
| Residuals: R (All reflections)        | 0.0440                                                                  |
| Residuals: wR2 (All reflections)      | 0.1021                                                                  |
| Goodness of Fit Indicator             | 1.084                                                                   |
| Max Shift/Error in Final Cycle        | 0.000                                                                   |
| Maximum peak in Final Diff. Map       | 0.85 e <sup>-</sup> Å <sup>3</sup>                                      |
| Minimum peak in Final Diff. Map       | -1.15 e <sup>-</sup> Å <sup>3</sup>                                     |

Table S5. Atomic coordinates and  $B_{\text{iso}}/B_{\text{eq}}$

| atom | x          | y           | z          | $B_{\text{eq}}$ |
|------|------------|-------------|------------|-----------------|
| Rh1  | 0.20638(3) | 0.34814(2)  | 0.28340(3) | 2.463(5)        |
| P1   | 0.13413(9) | 0.21553(6)  | 0.35910(9) | 2.587(17)       |
| O1   | 0.3913(3)  | 0.2213(2)   | -0.0506(3) | 4.08(7)         |
| O2   | 0.5076(3)  | 0.3092(2)   | 0.1647(3)  | 4.13(7)         |
| O3   | 0.2674(3)  | 0.26761(18) | 0.1245(3)  | 3.29(6)         |
| C1   | -0.0805(5) | 0.0558(3)   | 0.2697(5)  | 4.43(10)        |
| C2   | 0.5279(5)  | 0.2211(4)   | -0.0529(6) | 5.16(12)        |
| C3   | -0.0262(6) | 0.2492(4)   | 0.7759(5)  | 5.17(13)        |

|     |            |            |            |          |
|-----|------------|------------|------------|----------|
| C4  | -0.0179(4) | 0.1355(3)  | 0.0949(4)  | 3.40(8)  |
| C5  | 0.4784(7)  | 0.0773(5)  | 0.3898(6)  | 6.84(18) |
| C6  | 0.2073(4)  | 0.4472(3)  | 0.1547(4)  | 3.65(9)  |
| C7  | -0.1912(5) | -0.0031(3) | 0.0310(6)  | 4.97(11) |
| C8  | 0.1503(5)  | 0.2285(3)  | 0.6495(4)  | 4.02(10) |
| C9  | 0.0710(4)  | 0.2246(3)  | 0.5239(4)  | 3.07(8)  |
| C10 | 0.0870(5)  | 0.4842(4)  | 0.1684(5)  | 4.71(12) |
| C11 | 0.1017(6)  | 0.2409(4)  | 0.7743(5)  | 5.08(12) |
| C12 | 0.7291(6)  | 0.2897(5)  | 0.1545(8)  | 7.91(19) |
| C13 | 0.3969(4)  | 0.2101(4)  | 0.3960(5)  | 4.39(11) |
| C14 | 0.0493(5)  | 0.4942(3)  | 0.3134(5)  | 4.56(11) |
| C15 | 0.3262(5)  | 0.4763(3)  | 0.2490(5)  | 3.96(10) |
| C16 | -0.1139(4) | 0.0687(3)  | -0.0048(5) | 4.26(10) |
| C17 | 0.6394(9)  | 0.3949(5)  | 0.0381(10) | 10.8(3)  |
| C18 | -0.0587(4) | 0.2334(3)  | 0.5263(5)  | 3.76(9)  |
| C19 | 0.6041(5)  | 0.3035(4)  | 0.0741(6)  | 4.77(11) |
| C20 | 0.0000(4)  | 0.1289(3)  | 0.2327(4)  | 3.03(7)  |
| C21 | 0.5013(5)  | 0.1687(5)  | 0.4009(6)  | 6.07(16) |
| C22 | -0.1056(5) | 0.2458(4)  | 0.6513(5)  | 4.77(12) |
| C23 | 0.5570(8)  | 0.2232(7)  | -0.1953(7) | 10.2(3)  |
| C24 | 0.3538(5)  | 0.5560(3)  | 0.3795(6)  | 5.12(12) |
| C25 | 0.2061(5)  | 0.4382(3)  | 0.4770(4)  | 4.00(9)  |
| C26 | 0.0838(5)  | 0.4231(3)  | 0.3869(4)  | 3.65(9)  |
| C27 | 0.3188(6)  | 0.5237(4)  | 0.5090(6)  | 5.80(13) |
| C28 | -0.1752(5) | -0.0108(3) | 0.1682(6)  | 5.21(12) |
| C29 | 0.2436(6)  | 0.0642(3)  | 0.3717(5)  | 4.90(12) |
| C30 | 0.2670(4)  | 0.1578(3)  | 0.3795(4)  | 3.21(8)  |
| C31 | 0.3517(8)  | 0.0238(4)  | 0.3765(6)  | 6.87(17) |
| C32 | 0.5427(6)  | 0.1286(4)  | -0.0237(9) | 8.2(2)   |
| B1  | 0.3808(4)  | 0.2671(3)  | 0.0845(5)  | 3.03(8)  |

$$B_{eq} = 8/3 \pi^2 (U_{11}(aa^*)^2 + U_{22}(bb^*)^2 + U_{33}(cc^*)^2 + 2U_{12}(aa^*bb^*)\cos \gamma + 2U_{13}(aa^*cc^*)\cos \square + 2U_{23}(bb^*cc^*)\cos \alpha)$$

Table S6. Anisotropic displacement parameters

| atom | U <sub>11</sub> | U <sub>22</sub> | U <sub>33</sub> | U <sub>12</sub> | U <sub>13</sub> | U <sub>23</sub> |
|------|-----------------|-----------------|-----------------|-----------------|-----------------|-----------------|
| Rh1  | 0.03324(14)     | 0.03178(14)     | 0.02963(13)     | 0.01131(10)     | 0.00740(10)     | 0.00572(10)     |
| P1   | 0.0341(4)       | 0.0348(5)       | 0.0313(4)       | 0.0120(4)       | 0.0056(4)       | 0.0088(4)       |
| O1   | 0.0389(15)      | 0.071(2)        | 0.0439(16)      | 0.0206(14)      | 0.0142(12)      | 0.0001(14)      |

|     |            |            |            |            |             |             |
|-----|------------|------------|------------|------------|-------------|-------------|
| O2  | 0.0360(14) | 0.0628(19) | 0.0492(17) | 0.0055(13) | 0.0125(13)  | -0.0006(14) |
| O3  | 0.0390(14) | 0.0439(15) | 0.0427(14) | 0.0141(12) | 0.0157(12)  | 0.0042(12)  |
| C1  | 0.052(3)   | 0.050(2)   | 0.061(3)   | 0.003(2)   | 0.001(2)    | 0.019(2)    |
| C2  | 0.042(2)   | 0.088(4)   | 0.063(3)   | 0.019(2)   | 0.024(2)    | 0.001(3)    |
| C3  | 0.086(4)   | 0.079(3)   | 0.053(3)   | 0.039(3)   | 0.036(3)    | 0.030(3)    |
| C4  | 0.040(2)   | 0.044(2)   | 0.042(2)   | 0.0103(17) | 0.0044(16)  | 0.0061(17)  |
| C5  | 0.089(4)   | 0.130(6)   | 0.067(3)   | 0.081(4)   | 0.008(3)    | 0.029(4)    |
| C6  | 0.059(3)   | 0.045(2)   | 0.042(2)   | 0.0167(19) | 0.0171(19)  | 0.0180(18)  |
| C7  | 0.045(2)   | 0.056(3)   | 0.069(3)   | 0.006(2)   | -0.008(2)   | -0.008(2)   |
| C8  | 0.054(2)   | 0.064(3)   | 0.040(2)   | 0.023(2)   | 0.0081(18)  | 0.0143(19)  |
| C9  | 0.043(2)   | 0.043(2)   | 0.0374(19) | 0.0180(16) | 0.0129(16)  | 0.0143(16)  |
| C10 | 0.070(3)   | 0.063(3)   | 0.060(3)   | 0.034(3)   | 0.009(2)    | 0.027(2)    |
| C11 | 0.081(4)   | 0.083(4)   | 0.038(2)   | 0.034(3)   | 0.011(2)    | 0.018(2)    |
| C12 | 0.046(3)   | 0.131(6)   | 0.107(5)   | 0.023(4)   | 0.008(3)    | -0.003(4)   |
| C13 | 0.043(2)   | 0.078(3)   | 0.056(3)   | 0.025(2)   | 0.007(2)    | 0.029(2)    |
| C14 | 0.058(3)   | 0.055(3)   | 0.077(3)   | 0.034(2)   | 0.024(2)    | 0.023(2)    |
| C15 | 0.052(2)   | 0.041(2)   | 0.062(3)   | 0.0101(18) | 0.022(2)    | 0.019(2)    |
| C16 | 0.045(2)   | 0.060(3)   | 0.047(2)   | 0.013(2)   | -0.0058(19) | -0.001(2)   |
| C17 | 0.140(7)   | 0.089(5)   | 0.209(10)  | 0.015(5)   | 0.113(7)    | 0.064(6)    |
| C18 | 0.047(2)   | 0.059(3)   | 0.047(2)   | 0.023(2)   | 0.0149(18)  | 0.021(2)    |
| C19 | 0.041(2)   | 0.067(3)   | 0.071(3)   | 0.009(2)   | 0.024(2)    | 0.011(2)    |
| C20 | 0.0352(18) | 0.0363(19) | 0.042(2)   | 0.0098(15) | 0.0029(15)  | 0.0068(15)  |
| C21 | 0.054(3)   | 0.126(5)   | 0.074(4)   | 0.047(3)   | 0.013(3)    | 0.048(4)    |
| C22 | 0.062(3)   | 0.073(3)   | 0.068(3)   | 0.036(3)   | 0.032(2)    | 0.032(3)    |
| C23 | 0.092(5)   | 0.227(10)  | 0.071(4)   | 0.047(6)   | 0.048(4)    | 0.018(5)    |
| C24 | 0.061(3)   | 0.039(2)   | 0.080(4)   | 0.001(2)   | 0.002(3)    | 0.002(2)    |
| C25 | 0.075(3)   | 0.044(2)   | 0.0310(19) | 0.020(2)   | 0.0105(19)  | -0.0004(16) |
| C26 | 0.059(3)   | 0.042(2)   | 0.047(2)   | 0.0240(19) | 0.0266(19)  | 0.0093(17)  |
| C27 | 0.085(4)   | 0.055(3)   | 0.057(3)   | 0.004(3)   | -0.007(3)   | -0.010(2)   |
| C28 | 0.053(3)   | 0.046(3)   | 0.088(4)   | -0.003(2)  | 0.007(3)    | 0.012(2)    |
| C29 | 0.073(3)   | 0.053(3)   | 0.061(3)   | 0.032(2)   | -0.006(2)   | 0.009(2)    |
| C30 | 0.050(2)   | 0.045(2)   | 0.0324(18) | 0.0227(18) | 0.0058(16)  | 0.0106(16)  |
| C31 | 0.123(6)   | 0.070(4)   | 0.077(4)   | 0.067(4)   | -0.010(4)   | 0.008(3)    |
| C32 | 0.067(4)   | 0.078(4)   | 0.164(7)   | 0.041(3)   | 0.025(4)    | -0.001(4)   |
| B1  | 0.043(2)   | 0.036(2)   | 0.036(2)   | 0.0103(17) | 0.0144(18)  | 0.0067(17)  |

The general temperature factor expression:  $\exp(-2p^2(a^2U_{11}h^2 + b^2U_{22}k^2 + c^2U_{33}l^2 + 2a*b*U_{12}hk + 2a*c*U_{13}hl + 2b*c*U_{23}kl))$

Table S7. Bond lengths (Å)

| atom | atom | distance   | atom | atom | distance  |
|------|------|------------|------|------|-----------|
| Rh1  | P1   | 2.3202(11) | Rh1  | O3   | 2.046(3)  |
| Rh1  | C6   | 2.183(5)   | Rh1  | C15  | 2.203(5)  |
| Rh1  | C25  | 2.114(4)   | Rh1  | C26  | 2.124(5)  |
| P1   | C9   | 1.826(4)   | P1   | C20  | 1.834(3)  |
| P1   | C30  | 1.828(5)   | O1   | C2   | 1.440(6)  |
| O1   | B1   | 1.404(5)   | O2   | C19  | 1.439(6)  |
| O2   | B1   | 1.405(5)   | O3   | B1   | 1.302(6)  |
| C1   | C20  | 1.392(6)   | C1   | C28  | 1.386(6)  |
| C2   | C19  | 1.567(6)   | C2   | C23  | 1.486(9)  |
| C2   | C32  | 1.546(10)  | C3   | C11  | 1.382(9)  |
| C3   | C22  | 1.392(7)   | C4   | C16  | 1.385(5)  |
| C4   | C20  | 1.386(6)   | C5   | C21  | 1.347(11) |
| C5   | C31  | 1.376(10)  | C6   | C10  | 1.507(8)  |
| C6   | C15  | 1.391(6)   | C7   | C16  | 1.355(7)  |
| C7   | C28  | 1.385(9)   | C8   | C9   | 1.398(6)  |
| C8   | C11  | 1.387(7)   | C9   | C18  | 1.403(6)  |
| C10  | C14  | 1.522(8)   | C12  | C19  | 1.536(9)  |
| C13  | C21  | 1.387(9)   | C13  | C30  | 1.393(6)  |
| C14  | C26  | 1.519(8)   | C15  | C24  | 1.527(6)  |
| C17  | C19  | 1.500(11)  | C18  | C22  | 1.380(7)  |
| C24  | C27  | 1.528(8)   | C25  | C26  | 1.420(6)  |
| C25  | C27  | 1.506(7)   | C29  | C30  | 1.385(7)  |
| C29  | C31  | 1.412(10)  |      |      |           |

Table S8. Bond angles (°)

| atom | atom | atom | angle      | atom | atom | atom | angle      |
|------|------|------|------------|------|------|------|------------|
| P1   | Rh1  | O3   | 87.10(9)   | P1   | Rh1  | C6   | 158.50(10) |
| P1   | Rh1  | C15  | 164.16(13) | P1   | Rh1  | C25  | 94.08(13)  |
| P1   | Rh1  | C26  | 95.97(13)  | O3   | Rh1  | C6   | 87.45(15)  |
| O3   | Rh1  | C15  | 92.36(15)  | O3   | Rh1  | C25  | 161.89(16) |
| O3   | Rh1  | C26  | 158.69(13) | C6   | Rh1  | C15  | 36.97(16)  |
| C6   | Rh1  | C25  | 97.50(17)  | C6   | Rh1  | C26  | 82.00(18)  |
| C15  | Rh1  | C25  | 81.60(17)  | C15  | Rh1  | C26  | 90.28(17)  |
| C25  | Rh1  | C26  | 39.15(18)  | Rh1  | P1   | C9   | 119.17(14) |
| Rh1  | P1   | C20  | 112.86(14) | Rh1  | P1   | C30  | 110.74(14) |
| C9   | P1   | C20  | 103.38(17) | C9   | P1   | C30  | 104.71(19) |
| C20  | P1   | C30  | 104.69(17) | C2   | O1   | B1   | 108.4(3)   |

|     |     |     |          |     |     |     |          |
|-----|-----|-----|----------|-----|-----|-----|----------|
| C19 | O2  | B1  | 108.6(3) | Rh1 | O3  | B1  | 134.7(2) |
| C20 | C1  | C28 | 119.9(5) | O1  | C2  | C19 | 103.1(4) |
| O1  | C2  | C23 | 109.2(5) | O1  | C2  | C32 | 106.2(4) |
| C19 | C2  | C23 | 118.9(5) | C19 | C2  | C32 | 110.3(5) |
| C23 | C2  | C32 | 108.4(6) | C11 | C3  | C22 | 119.4(5) |
| C16 | C4  | C20 | 119.8(4) | C21 | C5  | C31 | 120.7(7) |
| Rh1 | C6  | C10 | 108.2(3) | Rh1 | C6  | C15 | 72.3(3)  |
| C10 | C6  | C15 | 126.3(4) | C16 | C7  | C28 | 120.4(4) |
| C9  | C8  | C11 | 120.6(5) | P1  | C9  | C8  | 122.0(3) |
| P1  | C9  | C18 | 119.1(3) | C8  | C9  | C18 | 118.8(4) |
| C6  | C10 | C14 | 113.6(4) | C3  | C11 | C8  | 120.3(5) |
| C21 | C13 | C30 | 120.5(5) | C10 | C14 | C26 | 113.3(4) |
| Rh1 | C15 | C6  | 70.7(3)  | Rh1 | C15 | C24 | 111.3(3) |
| C6  | C15 | C24 | 123.1(5) | C4  | C16 | C7  | 120.7(5) |
| C9  | C18 | C22 | 119.9(4) | O2  | C19 | C2  | 102.8(3) |
| O2  | C19 | C12 | 109.2(5) | O2  | C19 | C17 | 106.4(5) |
| C2  | C19 | C12 | 115.4(5) | C2  | C19 | C17 | 114.2(5) |
| C12 | C19 | C17 | 108.2(5) | P1  | C20 | C1  | 122.3(3) |
| P1  | C20 | C4  | 118.3(3) | C1  | C20 | C4  | 119.4(3) |
| C5  | C21 | C13 | 120.4(5) | C3  | C22 | C18 | 120.9(5) |
| C15 | C24 | C27 | 112.6(4) | Rh1 | C25 | C26 | 70.8(2)  |
| Rh1 | C25 | C27 | 111.3(3) | C26 | C25 | C27 | 125.3(5) |
| Rh1 | C26 | C14 | 112.9(3) | Rh1 | C26 | C25 | 70.1(3)  |
| C14 | C26 | C25 | 123.3(4) | C24 | C27 | C25 | 113.9(4) |
| C1  | C28 | C7  | 119.7(5) | C30 | C29 | C31 | 119.2(5) |
| P1  | C30 | C13 | 117.8(4) | P1  | C30 | C29 | 123.0(3) |
| C13 | C30 | C29 | 119.2(5) | C5  | C31 | C29 | 120.0(6) |
| O1  | B1  | O2  | 110.0(4) | O1  | B1  | O3  | 122.7(3) |
| O2  | B1  | O3  | 127.3(4) |     |     |     |          |



### 3. Crystallographic data and details of structure refinement of 3

#### *Experimental*

##### Data Collection

A dark orange prismatic crystal of  $C_{40}H_{50}PRh$  having approximate dimensions of 0.25 x 0.30 x 0.30 mm was mounted on a glass fiber. All measurements were made on a Rigaku AFC5R diffractometer with graphite monochromated Mo- $K\alpha$  radiation and a rotating anode generator.

Cell constants and an orientation matrix for data collection, obtained from a least-squares refinement using the setting angles of 20 carefully centered reflections in the range  $18.74 < 2\theta < 21.42^\circ$  corresponded to a primitive monoclinic cell with dimensions:

$$\begin{aligned}a &= 10.443(3) \text{ \AA} \\b &= 22.412(3) \text{ \AA} \quad \beta = 102.93(2)^\circ \\c &= 14.037(3) \text{ \AA} \\V &= 3202(1) \text{ \AA}^3\end{aligned}$$

For  $Z = 4$  and F.W. = 664.71, the calculated density is  $1.38 \text{ g/cm}^3$ . The systematic absences of:

$$\begin{aligned}h0l: & h+1 \pm 2n \\0k0: & k \pm 2n\end{aligned}$$

uniquely determine the space group to be:

$$P2_1/n \text{ (#14)}$$

The data were collected at a temperature of  $23 \pm 1^\circ\text{C}$  using the  $\omega$ - $2\theta$  scan technique to a maximum  $2\theta$  value of  $55.0^\circ$ . Omega scans of several intense reflections, made prior to data collection, had an average width at half-height of  $0.25^\circ$  with a take-off angle of  $6.0^\circ$ . Scans of  $(1.15 + 0.30 \tan \theta)^\circ$  were made at a speed of  $4.0^\circ/\text{min}$  (in  $\omega$ ). The weak reflections ( $I < 10.0\sigma(I)$ ) were rescanned (maximum of 3 scans) and the counts were accumulated to ensure good counting statistics. Stationary background counts were recorded on each side of the reflection. The ratio of peak counting time to background counting time was 2:1. The diameter of the incident beam collimator was 1.0 mm, the crystal to detector distance was 258 mm, and the detector aperture was 6.0 x 6.0 mm (horizontal x vertical).

##### Data Reduction

Of the 7950 reflections which were collected, 7554 were unique ( $R_{\text{int}} = 0.017$ ); equivalent reflections were merged. The intensities of three representative reflections were measured after every 150 reflections. No decay correction was applied.

The linear absorption coefficient,  $\mu$ , for Mo- $K\alpha$  radiation is  $6.1 \text{ cm}^{-1}$ . An empirical absorption correction based on azimuthal scans of several reflections was applied which resulted in transmission factors ranging from 1.00 to 1.00. The data were corrected for Lorentz and polarization effects.

##### Structure Solution and Refinement

The structure was solved by heavy-atom Patterson methods<sup>1</sup> and expanded using Fourier

techniques<sup>2</sup>. Some non-hydrogen atoms were refined anisotropically, while the rest were refined isotropically. Hydrogen atoms were included but not refined. The final cycle of full-matrix least-squares refinement<sup>3</sup> on F was based on 4927 observed reflections ( $I > 3.00 \sigma(I)$ ) and 337 variable parameters and converged (largest parameter shift was 4.37 times its esd) with unweighted and weighted agreement factors of:

$$R = \sum ||F_o| - |F_c|| / \sum |F_o| = 0.052$$

$$R_w = [\sum w (|F_o| - |F_c|)^2 / \sum w F_o^2]^{1/2} = 0.043$$

The standard deviation of an observation of unit weight<sup>4</sup> was 2.04. The weighting scheme was based on counting statistics and included a factor ( $p = 0.010$ ) to downweight the intense reflections. Plots of  $\sum w (|F_o| - |F_c|)^2$  versus  $|F_o|$ , reflection order in data collection,  $\sin \theta/\lambda$  and various classes of indices showed no unusual trends. The maximum and minimum peaks on the final difference Fourier map corresponded to 0.44 and  $-0.36 e^{-\rho}$ , respectively.

Neutral atom scattering factors were taken from Cromer and Waber<sup>5</sup>. Anomalous dispersion effects were included in  $F_{calc}$ <sup>6</sup>; the values for  $\Delta f'$  and  $\Delta f''$  were those of Creagh and McAuley<sup>7</sup>. The values for the mass attenuation coefficients are those of Creagh and Hubbell<sup>8</sup>. All calculations were performed using the teXsan<sup>9</sup> crystallographic software package of Molecular Structure Corporation.

#### *References*

- (1) PATY: Beurskens, P.T., Admiraal, G., Beurskens, G., Bosman, W.P., Garcia-Granda, S., Gould, R.O., Smits, J.M.M. and Smykalla, C. (1992). The DIRDIF program system, Technical Report of the Crystallography Laboratory, University of Nijmegen, The Netherlands.
- (2) DIRDIF94: Beurskens, P.T., Admiraal, G., Beurskens, G., Bosman, W.P., de Gelder, R., Israel, R. and Smits, J.M.M. (1994). The DIRDIF-94 program system, Technical Report of the Crystallography Laboratory, University of Nijmegen, The Netherlands.
- (3) Least Squares function minimized:

$$\sum w (|F_o| - |F_c|)^2 \text{ where}$$

$$w = 1/[\sigma^2(F_o)] = [\sigma_c^2(F_o) + \pi^2 F_o^2/4]^{-1}$$

$$\sigma_c(F_o) = \text{e.s.d. based on counting statistics}$$

$$p = \text{p-factor}$$

- (4) Standard deviation of an observation of unit weight:

$$[\sum w (|F_o| - |F_c|)^2 / (N_o - N_v)]^{1/2}$$

$$\text{where: } N_o = \text{number of observations}$$

$$N_v = \text{number of variables}$$

- (5) Cromer, D. T. & Waber, J. T.; "International Tables for X-ray Crystallography", Vol. IV, The Kynoch Press, Birmingham, England, Table 2.2 A (1974).

- (6) Ibers, J. A. & Hamilton, W. C.; *Acta Crystallogr.*, 17, 781 (1964).
- (7) Creagh, D. C. & McAuley, W.J; "International Tables for Crystallography", Vol C, (A.J.C. Wilson, ed.), Kluwer Academic Publishers, Boston, Table 4.2.6.8, pages 219-222 (1992).
- (8) Creagh, D. C. & Hubbell, J.H.; "International Tables for Crystallography", Vol C, (A.J.C. Wilson, ed.), Kluwer Academic Publishers, Boston, Table 4.2.4.3, pages 200-206 (1992).
- (9) teXsan for Windows: Crystal Structure Analysis Package, Molecular Structure Corporation (1997).

### *EXPERIMENTAL DETAILS*

#### A. Crystal Data

|                                       |                                                                                                                                                       |
|---------------------------------------|-------------------------------------------------------------------------------------------------------------------------------------------------------|
| Empirical Formula                     | $C_{34}H_{36}PRh \cdot C_6H_{14}$                                                                                                                     |
| Formula Weight                        | 664.71                                                                                                                                                |
| Crystal Color, Habit                  | dark orange, prismatic                                                                                                                                |
| Crystal Dimensions                    | 0.25 X 0.30 X 0.30 mm                                                                                                                                 |
| Crystal System                        | monoclinic                                                                                                                                            |
| Lattice Type                          | Primitive                                                                                                                                             |
| No. of Reflections Used for Unit      |                                                                                                                                                       |
| Cell Determination ( $2\theta$ range) | 20 ( $18.7 - 21.4^\circ$ )                                                                                                                            |
| Omega Scan Peak Width                 |                                                                                                                                                       |
| at Half-height                        | $0.25^\circ$                                                                                                                                          |
| Lattice Parameters                    | $a = 10.443(3) \text{ \AA}$<br>$b = 22.412(3) \text{ \AA}$<br>$c = 14.037(3) \text{ \AA}$<br>$\beta = 102.93(2)^\circ$<br>$V = 3202(1) \text{ \AA}^3$ |
| Space Group                           | $P2_1/n$ (#14)                                                                                                                                        |
| Z value                               | 4                                                                                                                                                     |
| $D_{calc}$                            | $1.379 \text{ g/cm}^3$                                                                                                                                |
| $F_{000}$                             | 1400.00                                                                                                                                               |
| $\mu(\text{MoK}\alpha)$               | $6.10 \text{ cm}^{-1}$                                                                                                                                |

#### B. Intensity Measurements

|                   |                                                                            |
|-------------------|----------------------------------------------------------------------------|
| Diffractometer    | Rigaku AFC5R                                                               |
| Radiation         | MoK $\alpha$ ( $\lambda = 0.71069 \text{ \AA}$ )<br>graphite monochromated |
| Attenuator        | Zr foil (factors = 1.00, 3.51, 11.52, 42.17)                               |
| Take-off Angle    | $6.0^\circ$                                                                |
| Detector Aperture | 6.0 mm horizontal                                                          |

|                              |                                                                         |
|------------------------------|-------------------------------------------------------------------------|
|                              | 6.0 mm vertical                                                         |
| Crystal to Detector Distance | 258 mm                                                                  |
| Voltage, Current             | 50 kV, 180 mA                                                           |
| Temperature                  | 23.0 °C                                                                 |
| Scan Type                    | $\omega$ -2 $\theta$                                                    |
| Scan Rate                    | 4.0°/min (in $\omega$ ) (up to 3 scans)                                 |
| Scan Width                   | (1.15 + 0.30 tan $\theta$ )°                                            |
| 2 $\theta$ <sub>max</sub>    | 55.0°                                                                   |
| No. of Reflections Measured  | Total: 7950<br>Unique: 7554 ( $R_{int} = 0.017$ )                       |
| Corrections                  | Lorentz-polarization<br>Absorption<br>(trans. factors: 1.0000 - 1.0000) |

### C. Structure Solution and Refinement

|                                          |                                            |
|------------------------------------------|--------------------------------------------|
| Structure Solution                       | Patterson Methods (DIRDIF92 PATTY)         |
| Refinement                               | Full-matrix least-squares on F             |
| Function Minimized                       | $\sum w ( F_o  -  F_c )^2$                 |
| Least Squares Weights                    | $1/\sigma^2(F_o) = 4F_o^2/\sigma^2(F_o^2)$ |
| p-factor                                 | 0.0100                                     |
| Anomalous Dispersion                     | All non-hydrogen atoms                     |
| No. Observations ( $I > 3.00\sigma(I)$ ) | 4927                                       |
| No. Variables                            | 337                                        |
| Reflection/Parameter Ratio               | 14.62                                      |
| Residuals: R; $R_w$                      | 0.052; 0.043                               |
| Goodness of Fit Indicator                | 2.04                                       |
| Max Shift/Error in Final Cycle           | 4.37                                       |
| Maximum peak in Final Diff. Map          | 0.44 e <sup>-</sup> /Å <sup>3</sup>        |
| Minimum peak in Final Diff. Map          | -0.36 e <sup>-</sup> /Å <sup>3</sup>       |

A solvent molecule (hexane) was included in the crystal structure of compound **3**, which was treated as disordered. Three hexane molecules were placed with the occupancy of 0.2 each. DFIX and DANG commands were used for restraint and the C atoms were refined isotropically. Because the placement of H atoms for the disordered molecule resulted in failure during the refinement, the H atoms were not placed.

Table S9. Atomic coordinates and  $B_{iso}/B_{eq}$

| atom | x | y | z | $B_{eq}$ |
|------|---|---|---|----------|
|------|---|---|---|----------|

|       |            |            |            |          |
|-------|------------|------------|------------|----------|
| Rh(1) | 0.06278(2) | 0.17946(1) | 0.22426(2) | 3.422(5) |
| P(1)  | 0.01093(8) | 0.10228(4) | 0.31936(6) | 3.19(2)  |
| C(1)  | -0.1311(3) | 0.2038(1)  | 0.1876(2)  | 3.44(7)  |
| C(2)  | -0.2113(3) | 0.1839(2)  | 0.0983(3)  | 4.39(8)  |
| C(3)  | -0.3412(4) | 0.2030(2)  | 0.0695(3)  | 6.0(1)   |
| C(4)  | -0.3946(4) | 0.2404(2)  | 0.1258(4)  | 6.7(1)   |
| C(5)  | -0.3198(4) | 0.2600(2)  | 0.2135(3)  | 5.8(1)   |
| C(6)  | -0.1883(3) | 0.2421(1)  | 0.2453(3)  | 4.11(8)  |
| C(7)  | -0.1598(4) | 0.1403(2)  | 0.0342(3)  | 6.3(1)   |
| C(8)  | -0.1104(4) | 0.2642(2)  | 0.3426(3)  | 5.6(1)   |
| C(9)  | 0.2806(3)  | 0.1789(2)  | 0.2853(3)  | 5.4(1)   |
| C(10) | 0.2512(4)  | 0.1417(2)  | 0.2075(3)  | 5.5(1)   |
| C(11) | 0.2643(4)  | 0.1560(2)  | 0.1061(4)  | 7.0(1)   |
| C(12) | 0.2133(4)  | 0.2163(2)  | 0.0678(3)  | 6.4(1)   |
| C(13) | 0.1000(3)  | 0.2381(2)  | 0.1091(3)  | 4.60(9)  |
| C(14) | 0.1120(3)  | 0.2711(2)  | 0.1927(3)  | 4.41(9)  |
| C(15) | 0.2353(4)  | 0.2891(2)  | 0.2629(3)  | 6.3(1)   |
| C(16) | 0.3381(4)  | 0.2411(2)  | 0.2853(3)  | 6.4(1)   |
| C(17) | -0.1330(3) | 0.1096(1)  | 0.3730(3)  | 3.74(8)  |
| C(18) | -0.1268(4) | 0.1166(2)  | 0.4713(3)  | 4.8(1)   |
| C(19) | -0.2393(5) | 0.1265(2)  | 0.5055(3)  | 6.4(1)   |
| C(20) | -0.3594(5) | 0.1292(2)  | 0.4426(4)  | 7.1(2)   |
| C(21) | -0.3692(4) | 0.1205(2)  | 0.3445(4)  | 6.4(1)   |
| C(22) | -0.2560(3) | 0.1107(2)  | 0.3093(3)  | 4.68(9)  |
| C(23) | 0.1452(3)  | 0.0885(1)  | 0.4245(2)  | 3.54(7)  |
| C(24) | 0.2147(4)  | 0.0361(2)  | 0.4395(3)  | 4.74(9)  |
| C(25) | 0.3253(4)  | 0.0321(2)  | 0.5153(3)  | 6.5(1)   |
| C(26) | 0.3649(4)  | 0.0803(2)  | 0.5767(3)  | 6.6(1)   |
| C(27) | 0.2943(4)  | 0.1325(2)  | 0.5615(3)  | 5.7(1)   |
| C(28) | 0.1868(3)  | 0.1364(2)  | 0.4865(3)  | 4.72(9)  |
| C(29) | -0.0165(3) | 0.0287(1)  | 0.2619(2)  | 3.51(7)  |
| C(30) | -0.0718(4) | -0.0173(2) | 0.3044(3)  | 4.8(1)   |
| C(31) | -0.0870(5) | -0.0730(2) | 0.2618(3)  | 6.3(1)   |
| C(32) | -0.0465(5) | -0.0839(2) | 0.1770(3)  | 6.8(1)   |
| C(33) | 0.0090(5)  | -0.0390(2) | 0.1340(3)  | 6.7(1)   |
| C(34) | 0.0242(4)  | 0.0174(2)  | 0.1764(3)  | 5.0(1)   |
| C(35) | 0.5824(9)  | 0.0228(4)  | 0.8318(7)  | 19.7(4)  |
| C(36) | 0.467(2)   | 0.0335(7)  | 0.886(1)   | 29.7(7)  |
| C(37) | 0.508(3)   | 0.001(1)   | 0.956(2)   | 35.5(9)  |

|       |         |         |         |       |
|-------|---------|---------|---------|-------|
| H(1)  | -0.3936 | 0.1895  | 0.0091  | 7.201 |
| H(2)  | -0.4833 | 0.2530  | 0.1049  | 8.010 |
| H(3)  | -0.3576 | 0.2859  | 0.2532  | 6.920 |
| H(4)  | -0.0937 | 0.1590  | 0.0079  | 7.526 |
| H(5)  | -0.1235 | 0.1066  | 0.0720  | 7.526 |
| H(6)  | -0.2296 | 0.1277  | -0.0175 | 7.526 |
| H(7)  | -0.1065 | 0.3066  | 0.3418  | 6.670 |
| H(8)  | -0.1518 | 0.2517  | 0.3930  | 6.670 |
| H(9)  | -0.0239 | 0.2484  | 0.3544  | 6.670 |
| H(10) | 0.3061  | 0.1589  | 0.3463  | 6.516 |
| H(11) | 0.2621  | 0.1006  | 0.2241  | 6.559 |
| H(12) | 0.2176  | 0.1265  | 0.0634  | 8.358 |
| H(13) | 0.3549  | 0.1541  | 0.1051  | 8.358 |
| H(14) | 0.2831  | 0.2443  | 0.0841  | 7.689 |
| H(15) | 0.1848  | 0.2138  | -0.0013 | 7.689 |
| H(16) | 0.0235  | 0.2472  | 0.0605  | 5.517 |
| H(17) | 0.0416  | 0.2984  | 0.1903  | 5.293 |
| H(18) | 0.2135  | 0.3007  | 0.3225  | 7.592 |
| H(19) | 0.2718  | 0.3223  | 0.2361  | 7.592 |
| H(20) | 0.3926  | 0.2486  | 0.3480  | 7.664 |
| H(21) | 0.3895  | 0.2425  | 0.2374  | 7.664 |
| H(22) | -0.0441 | 0.1145  | 0.5163  | 5.760 |
| H(23) | -0.2328 | 0.1315  | 0.5736  | 7.716 |
| H(24) | -0.4358 | 0.1371  | 0.4666  | 8.561 |
| H(25) | -0.4529 | 0.1212  | 0.3006  | 7.639 |
| H(26) | -0.2630 | 0.1047  | 0.2414  | 5.609 |
| H(27) | 0.1873  | 0.0028  | 0.3982  | 5.689 |
| H(28) | 0.3743  | -0.0040 | 0.5252  | 7.828 |
| H(29) | 0.4403  | 0.0774  | 0.6289  | 7.868 |
| H(30) | 0.3205  | 0.1658  | 0.6032  | 6.896 |
| H(31) | 0.1390  | 0.1728  | 0.4761  | 5.654 |
| H(32) | -0.0997 | -0.0106 | 0.3635  | 5.764 |
| H(33) | -0.1259 | -0.1042 | 0.2914  | 7.504 |
| H(34) | -0.0570 | -0.1225 | 0.1483  | 8.183 |
| H(35) | 0.0372  | -0.0463 | 0.0753  | 7.993 |
| H(36) | 0.0629  | 0.0484  | 0.1464  | 6.025 |

$$B_{eq} = 8/3 \pi^2 (U_{11}(aa^*)^2 + U_{22}(bb^*)^2 + U_{33}(cc^*)^2 + 2U_{12}(aa^*bb^*)\cos \gamma + 2U_{13}(aa^*cc^*)\cos \square +$$

$2U_{23}(bb*cc*)\cos \alpha$

Table S10. Anisotropic Displacement Parameters

| atom  | U <sub>11</sub> | U <sub>22</sub> | U <sub>33</sub> | U <sub>12</sub> | U <sub>13</sub> | U <sub>23</sub> |
|-------|-----------------|-----------------|-----------------|-----------------|-----------------|-----------------|
| Rh(1) | 0.0378(1)       | 0.0450(1)       | 0.0499(1)       | 0.0034(1)       | 0.0154(1)       | 0.0081(1)       |
| P(1)  | 0.0426(5)       | 0.0377(4)       | 0.0426(5)       | 0.0032(4)       | 0.0131(4)       | 0.0008(4)       |
| C(1)  | 0.042(2)        | 0.043(2)        | 0.048(2)        | 0.000(1)        | 0.015(1)        | 0.011(1)        |
| C(2)  | 0.051(2)        | 0.057(2)        | 0.057(2)        | -0.004(2)       | 0.006(2)        | 0.015(2)        |
| C(3)  | 0.046(2)        | 0.090(3)        | 0.083(3)        | -0.008(2)       | -0.004(2)       | 0.034(3)        |
| C(4)  | 0.039(2)        | 0.095(4)        | 0.120(4)        | 0.008(2)        | 0.020(2)        | 0.049(3)        |
| C(5)  | 0.063(3)        | 0.060(3)        | 0.111(4)        | 0.015(2)        | 0.048(3)        | 0.027(3)        |
| C(6)  | 0.052(2)        | 0.043(2)        | 0.069(2)        | 0.007(2)        | 0.029(2)        | 0.014(2)        |
| C(7)  | 0.091(3)        | 0.084(3)        | 0.053(2)        | -0.009(3)       | -0.005(2)       | -0.005(2)       |
| C(8)  | 0.098(3)        | 0.050(2)        | 0.072(3)        | 0.010(2)        | 0.039(2)        | -0.004(2)       |
| C(9)  | 0.037(2)        | 0.090(3)        | 0.080(3)        | 0.008(2)        | 0.014(2)        | 0.026(3)        |
| C(10) | 0.050(2)        | 0.065(3)        | 0.101(3)        | 0.013(2)        | 0.032(2)        | 0.012(2)        |
| C(11) | 0.081(3)        | 0.087(3)        | 0.113(4)        | 0.002(3)        | 0.056(3)        | -0.014(3)       |
| C(12) | 0.085(3)        | 0.098(4)        | 0.073(3)        | -0.005(3)       | 0.044(3)        | 0.005(3)        |
| C(13) | 0.058(2)        | 0.064(2)        | 0.057(2)        | 0.001(2)        | 0.023(2)        | 0.017(2)        |
| C(14) | 0.055(2)        | 0.044(2)        | 0.071(3)        | -0.000(2)       | 0.019(2)        | 0.014(2)        |
| C(15) | 0.071(3)        | 0.076(3)        | 0.089(3)        | -0.021(2)       | 0.009(2)        | 0.000(3)        |
| C(16) | 0.046(2)        | 0.105(4)        | 0.088(3)        | -0.013(2)       | 0.007(2)        | -0.001(3)       |
| C(17) | 0.055(2)        | 0.033(2)        | 0.059(2)        | 0.001(1)        | 0.022(2)        | 0.004(2)        |
| C(18) | 0.069(3)        | 0.058(2)        | 0.062(2)        | -0.002(2)       | 0.030(2)        | -0.005(2)       |
| C(19) | 0.098(4)        | 0.070(3)        | 0.093(4)        | -0.005(3)       | 0.058(3)        | -0.017(3)       |
| C(20) | 0.103(4)        | 0.058(3)        | 0.138(5)        | 0.008(3)        | 0.086(4)        | 0.004(3)        |
| C(21) | 0.048(2)        | 0.064(3)        | 0.137(4)        | 0.006(2)        | 0.037(3)        | 0.029(3)        |
| C(22) | 0.050(2)        | 0.058(2)        | 0.074(3)        | 0.003(2)        | 0.023(2)        | 0.016(2)        |
| C(23) | 0.048(2)        | 0.044(2)        | 0.043(2)        | 0.000(1)        | 0.012(2)        | 0.001(1)        |
| C(24) | 0.056(2)        | 0.049(2)        | 0.070(3)        | 0.006(2)        | 0.004(2)        | 0.005(2)        |
| C(25) | 0.069(3)        | 0.066(3)        | 0.103(4)        | 0.014(2)        | -0.001(3)       | 0.018(3)        |
| C(26) | 0.059(3)        | 0.115(4)        | 0.065(3)        | -0.005(3)       | -0.007(2)       | 0.015(3)        |
| C(27) | 0.068(3)        | 0.086(3)        | 0.063(3)        | -0.011(2)       | 0.011(2)        | -0.017(2)       |
| C(28) | 0.055(2)        | 0.060(2)        | 0.061(2)        | 0.004(2)        | 0.007(2)        | -0.010(2)       |
| C(29) | 0.051(2)        | 0.040(2)        | 0.044(2)        | 0.004(1)        | 0.012(1)        | -0.003(1)       |
| C(30) | 0.082(3)        | 0.046(2)        | 0.060(2)        | -0.009(2)       | 0.028(2)        | -0.007(2)       |
| C(31) | 0.111(4)        | 0.052(2)        | 0.080(3)        | -0.022(2)       | 0.033(3)        | -0.010(2)       |
| C(32) | 0.124(4)        | 0.053(3)        | 0.086(3)        | -0.010(3)       | 0.032(3)        | -0.020(2)       |
| C(33) | 0.122(4)        | 0.072(3)        | 0.067(3)        | -0.001(3)       | 0.039(3)        | -0.020(2)       |

C(34) 0.085(3) 0.052(2) 0.059(2) -0.003(2) 0.027(2) -0.005(2)

The general temperature factor expression:

$$\exp(-2\pi^2(a^2U_{11}h^2 + b^2U_{22}k^2 + c^2U_{33}l^2 + 2a*b*U_{12}hk + 2a*c*U_{13}hl + 2b*c*U_{23}kl))$$

Table S11. Bond Lengths(Å)

| atom  | atom  | distance | atom  | atom  | distance |
|-------|-------|----------|-------|-------|----------|
| Rh(1) | P(1)  | 2.322(1) | Rh(1) | C(1)  | 2.049(4) |
| Rh(1) | C(9)  | 2.244(5) | Rh(1) | C(10) | 2.203(5) |
| Rh(1) | C(13) | 2.185(5) | Rh(1) | C(14) | 2.187(5) |
| P(1)  | C(17) | 1.834(5) | P(1)  | C(23) | 1.820(5) |
| P(1)  | C(29) | 1.829(4) | C(1)  | C(2)  | 1.415(6) |
| C(1)  | C(6)  | 1.402(6) | C(2)  | C(3)  | 1.393(7) |
| C(2)  | C(7)  | 1.506(7) | C(3)  | C(4)  | 1.354(8) |
| C(4)  | C(5)  | 1.374(8) | C(5)  | C(6)  | 1.404(7) |
| C(6)  | C(8)  | 1.508(7) | C(9)  | C(10) | 1.354(7) |
| C(9)  | C(16) | 1.517(8) | C(10) | C(11) | 1.495(8) |
| C(11) | C(12) | 1.508(8) | C(12) | C(13) | 1.511(7) |
| C(13) | C(14) | 1.369(7) | C(14) | C(15) | 1.492(7) |
| C(15) | C(16) | 1.503(8) | C(17) | C(18) | 1.375(6) |
| C(17) | C(22) | 1.391(6) | C(18) | C(19) | 1.383(7) |
| C(19) | C(20) | 1.364(9) | C(20) | C(21) | 1.371(9) |
| C(21) | C(22) | 1.397(7) | C(23) | C(24) | 1.372(6) |
| C(23) | C(28) | 1.389(6) | C(24) | C(25) | 1.387(7) |
| C(25) | C(26) | 1.388(8) | C(26) | C(27) | 1.374(8) |
| C(27) | C(28) | 1.359(7) | C(29) | C(30) | 1.382(6) |
| C(29) | C(34) | 1.383(6) | C(30) | C(31) | 1.377(7) |
| C(31) | C(32) | 1.371(8) | C(32) | C(33) | 1.368(8) |
| C(33) | C(34) | 1.391(7) | C(35) | C(36) | 1.58(2)  |
| C(36) | C(37) | 1.21(4)  | C(37) | C(37) | 1.30(7)  |

Table S12. Bond Angles(°)

| atom | atom  | atom  | angle    | atom | atom  | atom  | angle    |
|------|-------|-------|----------|------|-------|-------|----------|
| P(1) | Rh(1) | C(1)  | 89.9(1)  | P(1) | Rh(1) | C(9)  | 97.1(1)  |
| P(1) | Rh(1) | C(10) | 96.0(2)  | P(1) | Rh(1) | C(13) | 167.6(2) |
| P(1) | Rh(1) | C(14) | 155.8(1) | C(1) | Rh(1) | C(9)  | 163.3(2) |
| C(1) | Rh(1) | C(10) | 158.8(2) | C(1) | Rh(1) | C(13) | 89.1(2)  |
| C(1) | Rh(1) | C(14) | 87.9(2)  | C(9) | Rh(1) | C(10) | 35.4(2)  |



|       |       |       |          |       |       |       |          |
|-------|-------|-------|----------|-------|-------|-------|----------|
| C(9)  | Rh(1) | C(13) | 87.3(2)  | C(9)  | Rh(1) | C(14) | 79.5(2)  |
| C(10) | Rh(1) | C(13) | 80.9(2)  | C(10) | Rh(1) | C(14) | 94.8(2)  |
| C(13) | Rh(1) | C(14) | 36.5(2)  | Rh(1) | P(1)  | C(17) | 119.2(1) |
| Rh(1) | P(1)  | C(23) | 110.8(2) | Rh(1) | P(1)  | C(29) | 116.8(2) |
| C(17) | P(1)  | C(23) | 103.6(2) | C(17) | P(1)  | C(29) | 101.5(2) |
| C(23) | P(1)  | C(29) | 102.8(2) | Rh(1) | C(1)  | C(2)  | 119.6(4) |
| Rh(1) | C(1)  | C(6)  | 122.9(4) | C(2)  | C(1)  | C(6)  | 117.5(4) |
| C(1)  | C(2)  | C(3)  | 120.3(5) | C(1)  | C(2)  | C(7)  | 120.9(5) |
| C(3)  | C(2)  | C(7)  | 118.7(5) | C(2)  | C(3)  | C(4)  | 121.5(6) |
| C(3)  | C(4)  | C(5)  | 119.7(5) | C(4)  | C(5)  | C(6)  | 120.9(6) |
| C(1)  | C(6)  | C(5)  | 120.2(5) | C(1)  | C(6)  | C(8)  | 120.8(4) |
| C(5)  | C(6)  | C(8)  | 119.0(5) | Rh(1) | C(9)  | C(10) | 70.6(3)  |
| Rh(1) | C(9)  | C(16) | 111.2(4) | C(10) | C(9)  | C(16) | 125.7(5) |
| Rh(1) | C(10) | C(9)  | 74.0(3)  | Rh(1) | C(10) | C(11) | 107.1(4) |
| C(9)  | C(10) | C(11) | 125.7(6) | C(10) | C(11) | C(12) | 115.5(5) |
| C(11) | C(12) | C(13) | 113.5(5) | Rh(1) | C(13) | C(12) | 111.9(4) |
| Rh(1) | C(13) | C(14) | 71.8(3)  | C(12) | C(13) | C(14) | 125.1(5) |
| Rh(1) | C(14) | C(13) | 71.7(3)  | Rh(1) | C(14) | C(15) | 109.1(4) |
| C(13) | C(14) | C(15) | 127.8(5) | C(14) | C(15) | C(16) | 114.5(5) |
| C(9)  | C(16) | C(15) | 113.2(5) | P(1)  | C(17) | C(18) | 124.3(4) |
| P(1)  | C(17) | C(22) | 117.5(4) | C(18) | C(17) | C(22) | 118.2(5) |
| C(17) | C(18) | C(19) | 120.9(6) | C(18) | C(19) | C(20) | 120.8(6) |
| C(19) | C(20) | C(21) | 119.7(6) | C(20) | C(21) | C(22) | 119.9(6) |
| C(17) | C(22) | C(21) | 120.5(5) | P(1)  | C(23) | C(24) | 123.7(4) |
| P(1)  | C(23) | C(28) | 117.0(4) | C(24) | C(23) | C(28) | 119.0(5) |
| C(23) | C(24) | C(25) | 119.7(5) | C(24) | C(25) | C(26) | 120.4(6) |
| C(25) | C(26) | C(27) | 119.5(5) | C(26) | C(27) | C(28) | 119.8(6) |
| C(23) | C(28) | C(27) | 121.6(5) | P(1)  | C(29) | C(30) | 121.5(4) |
| P(1)  | C(29) | C(34) | 120.0(4) | C(30) | C(29) | C(34) | 118.4(4) |
| C(29) | C(30) | C(31) | 120.5(5) | C(30) | C(31) | C(32) | 120.7(5) |
| C(31) | C(32) | C(33) | 119.7(5) | C(32) | C(33) | C(34) | 119.9(5) |
| C(29) | C(34) | C(33) | 120.7(5) | C(35) | C(36) | C(37) | 97(3)    |
| C(36) | C(37) | C(37) | 135(6)   |       |       |       |          |

#### 4. Copies of NMR spectra

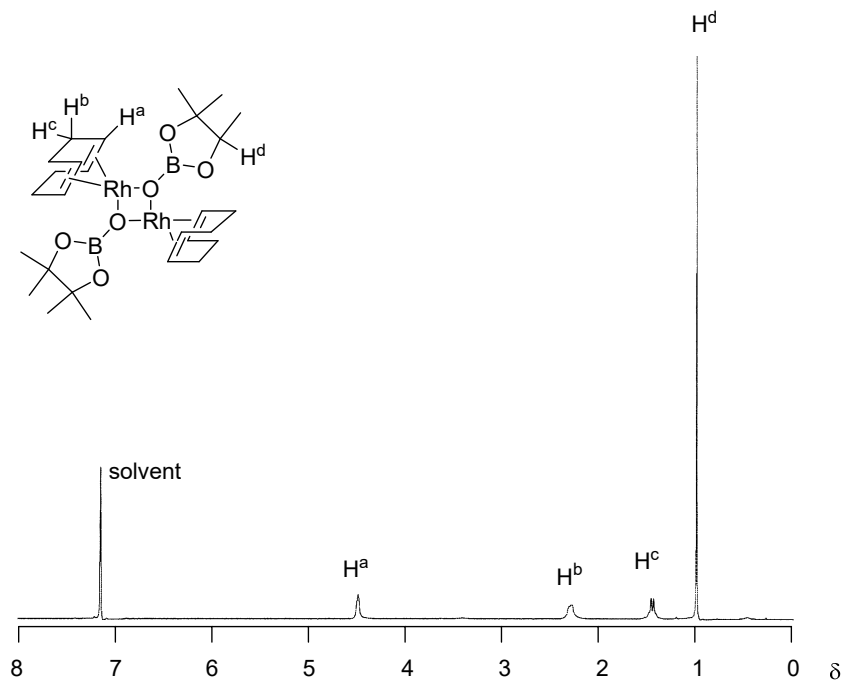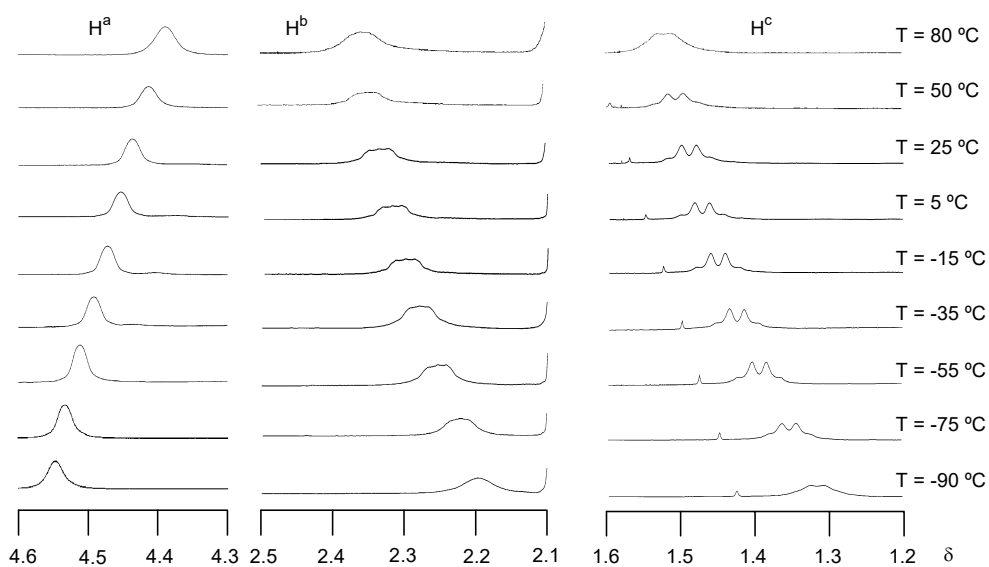

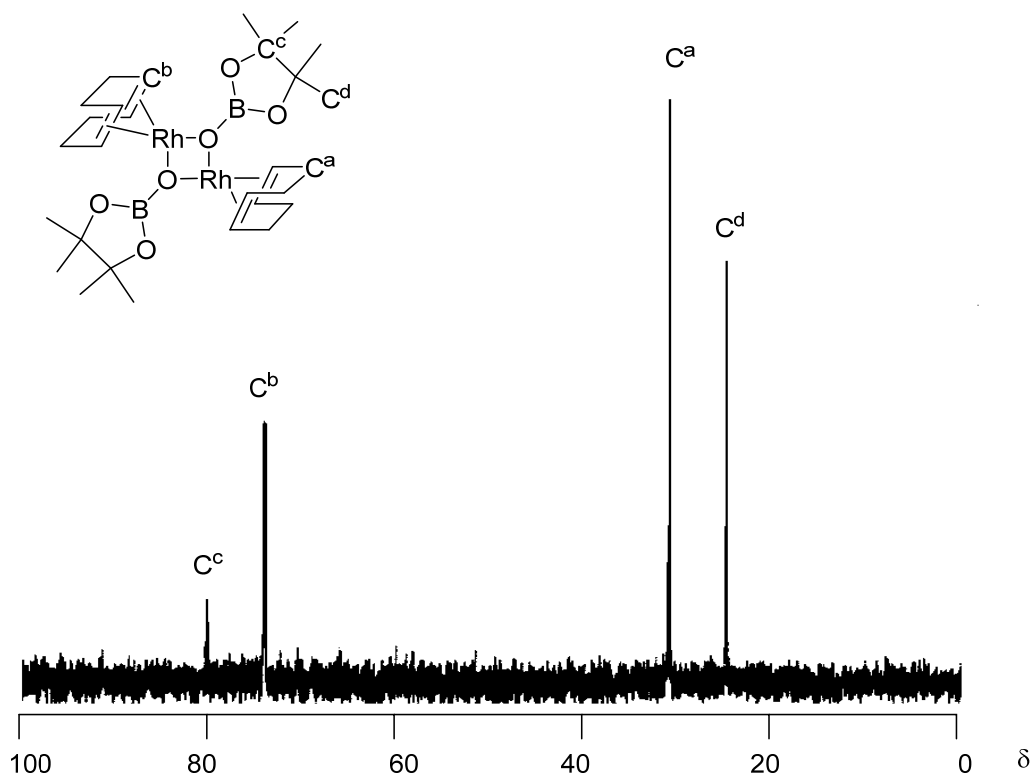

<sup>13</sup>C{<sup>1</sup>H} NMR spectrum (75.3 MHz) of **1** (C<sub>6</sub>D<sub>6</sub>, rt).

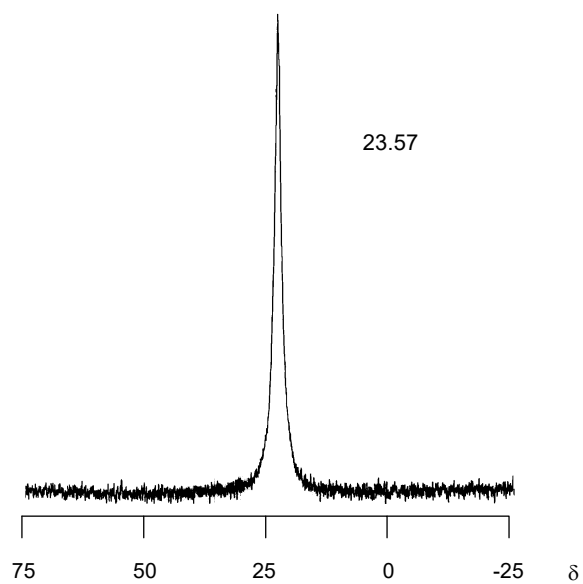

<sup>11</sup>B{<sup>1</sup>H} NMR Spectrum (160.4 MHz) of **1** (C<sub>6</sub>D<sub>6</sub>, rt).

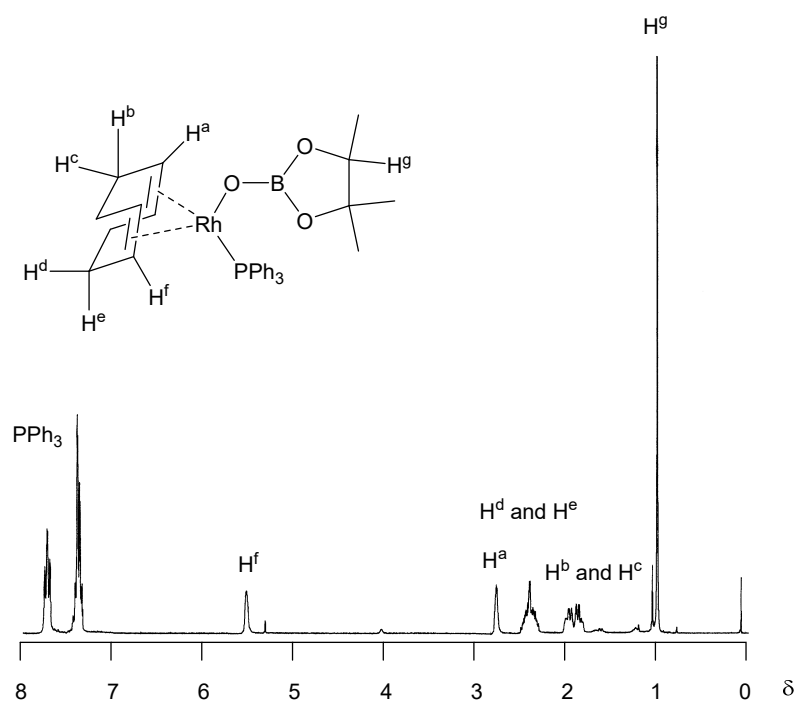

$^1\text{H}$  NMR spectrum (300 MHz) of **2** ( $\text{CD}_2\text{Cl}_2$ , rt).

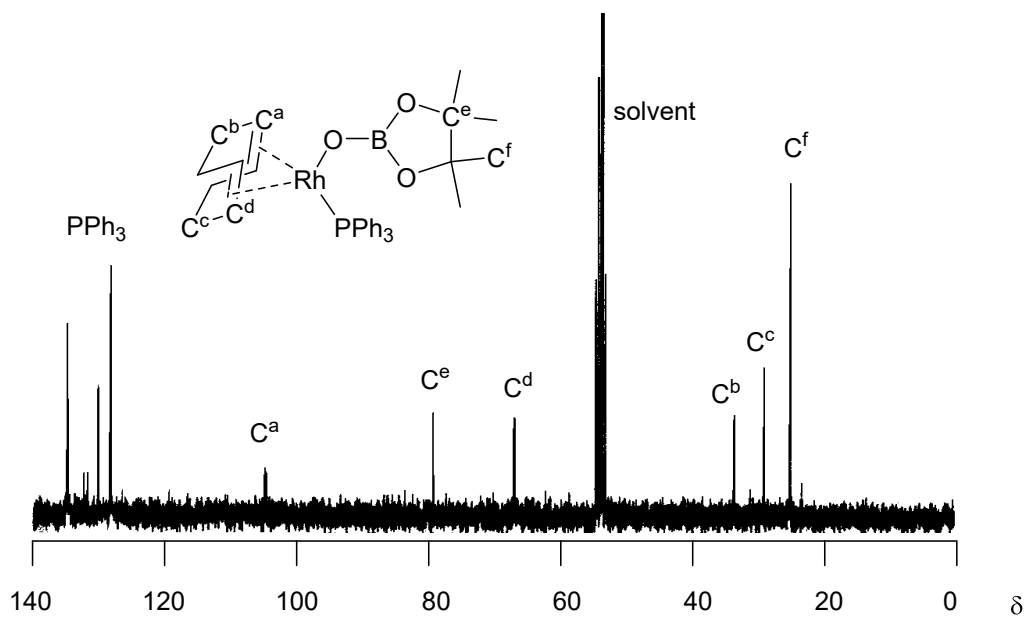

$^{13}\text{C}\{^1\text{H}\}$  NMR spectrum (75.3 MHz) of **2** ( $\text{CD}_2\text{Cl}_2$ , rt).

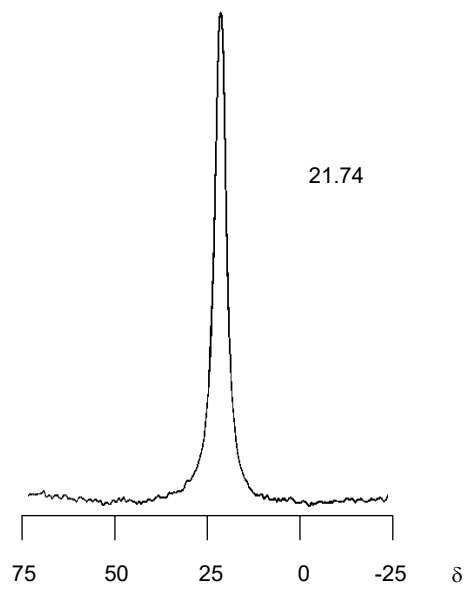

$^{11}\text{B}\{^1\text{H}\}$  NMR spectrum (160.4 MHz) of **3** ( $\text{C}_6\text{D}_6$ , rt).

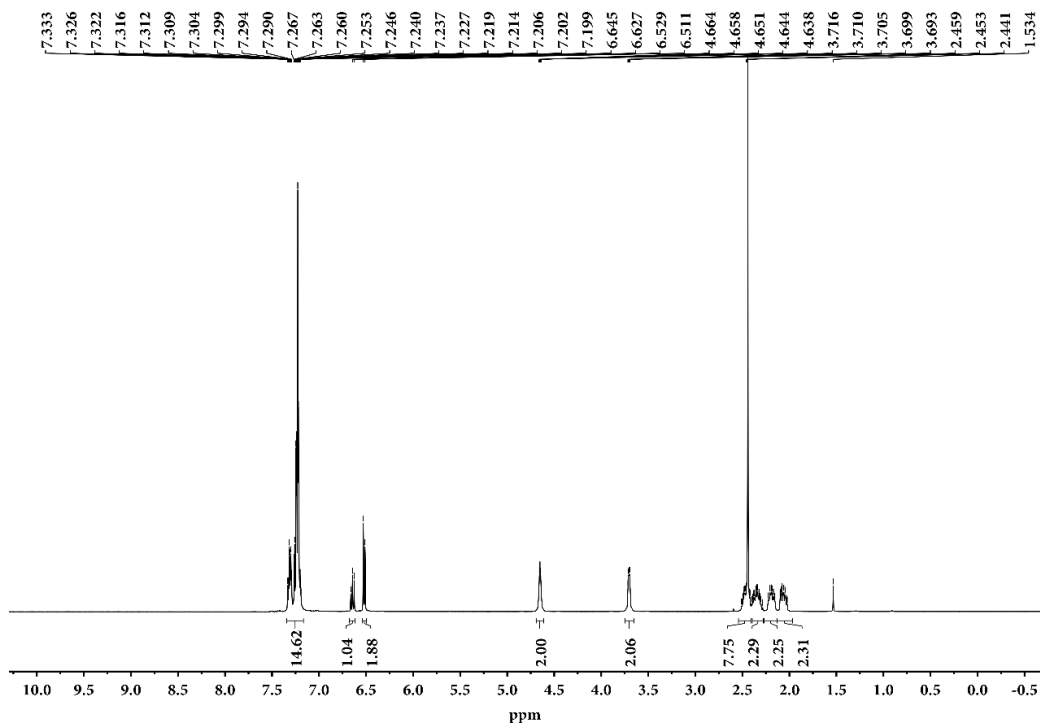

$^1\text{H}$  NMR spectrum (300 MHz) of **3** ( $\text{CDCl}_3$ , rt).

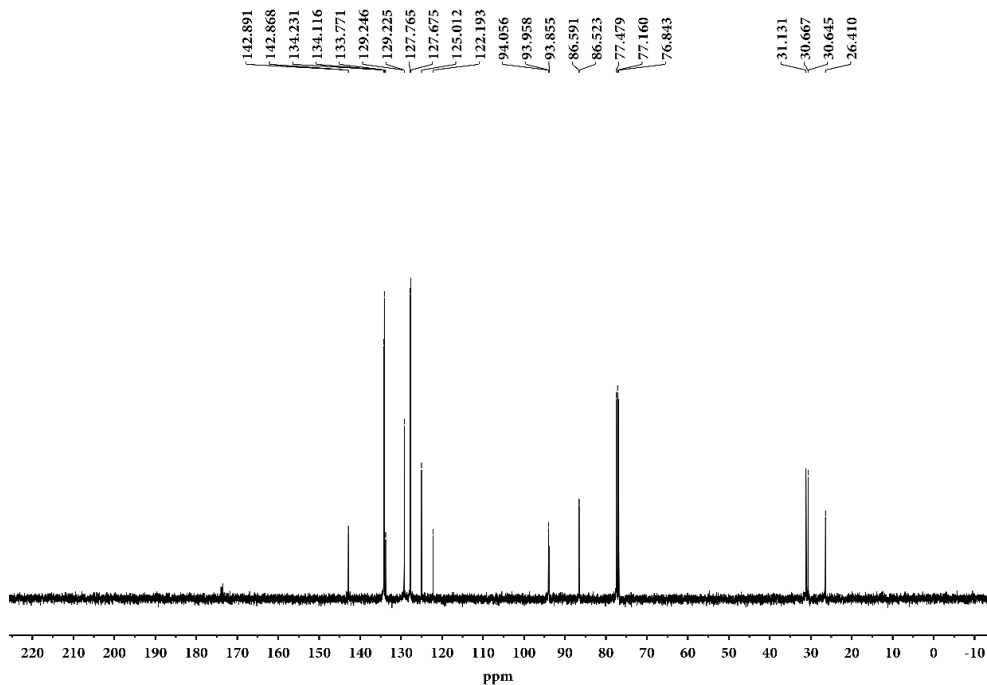

$^{13}\text{C}\{^1\text{H}\}$  NMR (100 MHz) of **3** ( $\text{CDCl}_3$ , rt).

**5. Identification of byproducts in the reaction of  $[\text{Rh}(\text{OMe})(\text{cod})]_2$  with 4-methylphenylboronic acid pinacol ester.**

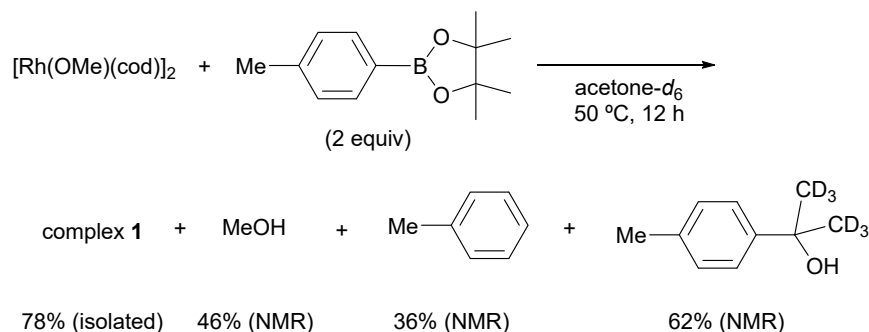

In 25 mL pf Schlenk tube were added  $[\text{Rh}(\text{OMe})(\text{cod})]_2$  (24 mg, 0.05 mmol), 4-methylphenylboronic acid pinacol ester (22 mg, 0.10 mmol), and triphenylmethane (24 mg, 0.10 mmol) as an internal standard in acetone-*d*<sub>6</sub> (2.5 mL), and the reaction was heated at 50 °C under N<sub>2</sub> atmosphere. After 12 h, the reaction mixture was filtered and the filtrate was transferred to an NMR tube. The residue was dried in vacuo to give complex **1** as pale yellow powder (28 mg, 0.039 mmol, 78%). The <sup>1</sup>H NMR measurement indicated the formation of 46% of methanol, 36% of toluene, and 62% of 2-(4-methylphenyl)-2-propanol.

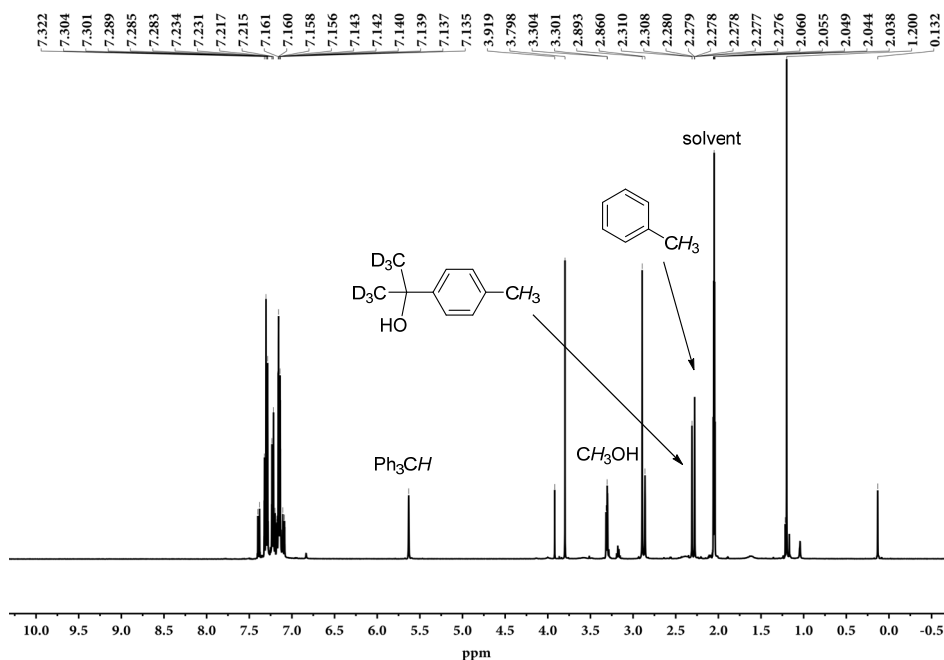

<sup>1</sup>H NMR spectrum (300 MHz) of the crude mixture ((CD<sub>3</sub>)<sub>2</sub>CO, rt).
